# Supplementary material
Source: PubMed Central journal article supplement (PMC3814126)

## Supporting Information

### The synthesis and antibacterial activity of doxycycline neoglycosides

Jianjun Zhang,<sup>†</sup> Larissa V. Ponomareva,<sup>†</sup> Karen Marchillo,<sup>‡</sup> Maoquan Zhou,<sup>§</sup> David R. Andes,<sup>‡</sup> and Jon S. Thorson<sup>†\*</sup>

<sup>†</sup> Center for Pharmaceutical Research and Innovation, College of Pharmacy, University of Kentucky, 789 South Limestone Street, Lexington, KY 40536-0596, USA.

<sup>‡</sup> Department of Medicine and Medical Microbiology and Immunology, University of Wisconsin-Madison, 1685 Highland Avenue, Madison, Wisconsin, 53705-2281, USA.

<sup>§</sup> Pharmaceutical Sciences Division, School of Pharmacy, University of Wisconsin-Madison, 777 Highland Avenue, Madison, Wisconsin 53705-2222, USA.

jsthorson@uky.edu

#### Supplementary tables

|                                                                               |     |
|-------------------------------------------------------------------------------|-----|
| <b>Table S1.</b> Key characterization data for doxycycline neoglycosides..... | S3  |
| <b>Table S2.</b> Neoglycoside antibacterial assays.....                       | S4  |
| <b>Table S3.</b> Neoglycoside single dose cytotoxicity assays.....            | S5  |
| <b>Table S4.</b> NMR spectra.....                                             | S10 |

#### Supplementary figures

|                                                                                                |         |
|------------------------------------------------------------------------------------------------|---------|
| <b>Figure S1.</b> Doxycycline neoglycosides library.....                                       | S2      |
| <b>Figure S2.</b> Synthesis of forosamine <b>18</b> .....                                      | S6      |
| <b>Figure S3.</b> Synthesis of 2-azido-D-xylose <b>39</b> and 4-azido-L-ribose <b>40</b> ..... | S6      |
| NMR Spectra.....                                                                               | S11-S34 |

#### Supplementary Methods

|                                                                                                     |       |
|-----------------------------------------------------------------------------------------------------|-------|
| Synthesis of forosamine <b>18</b> , 2-azido-D-xylose <b>39</b> and 4-azido-L-ribose <b>40</b> ..... | S7-S9 |
|-----------------------------------------------------------------------------------------------------|-------|

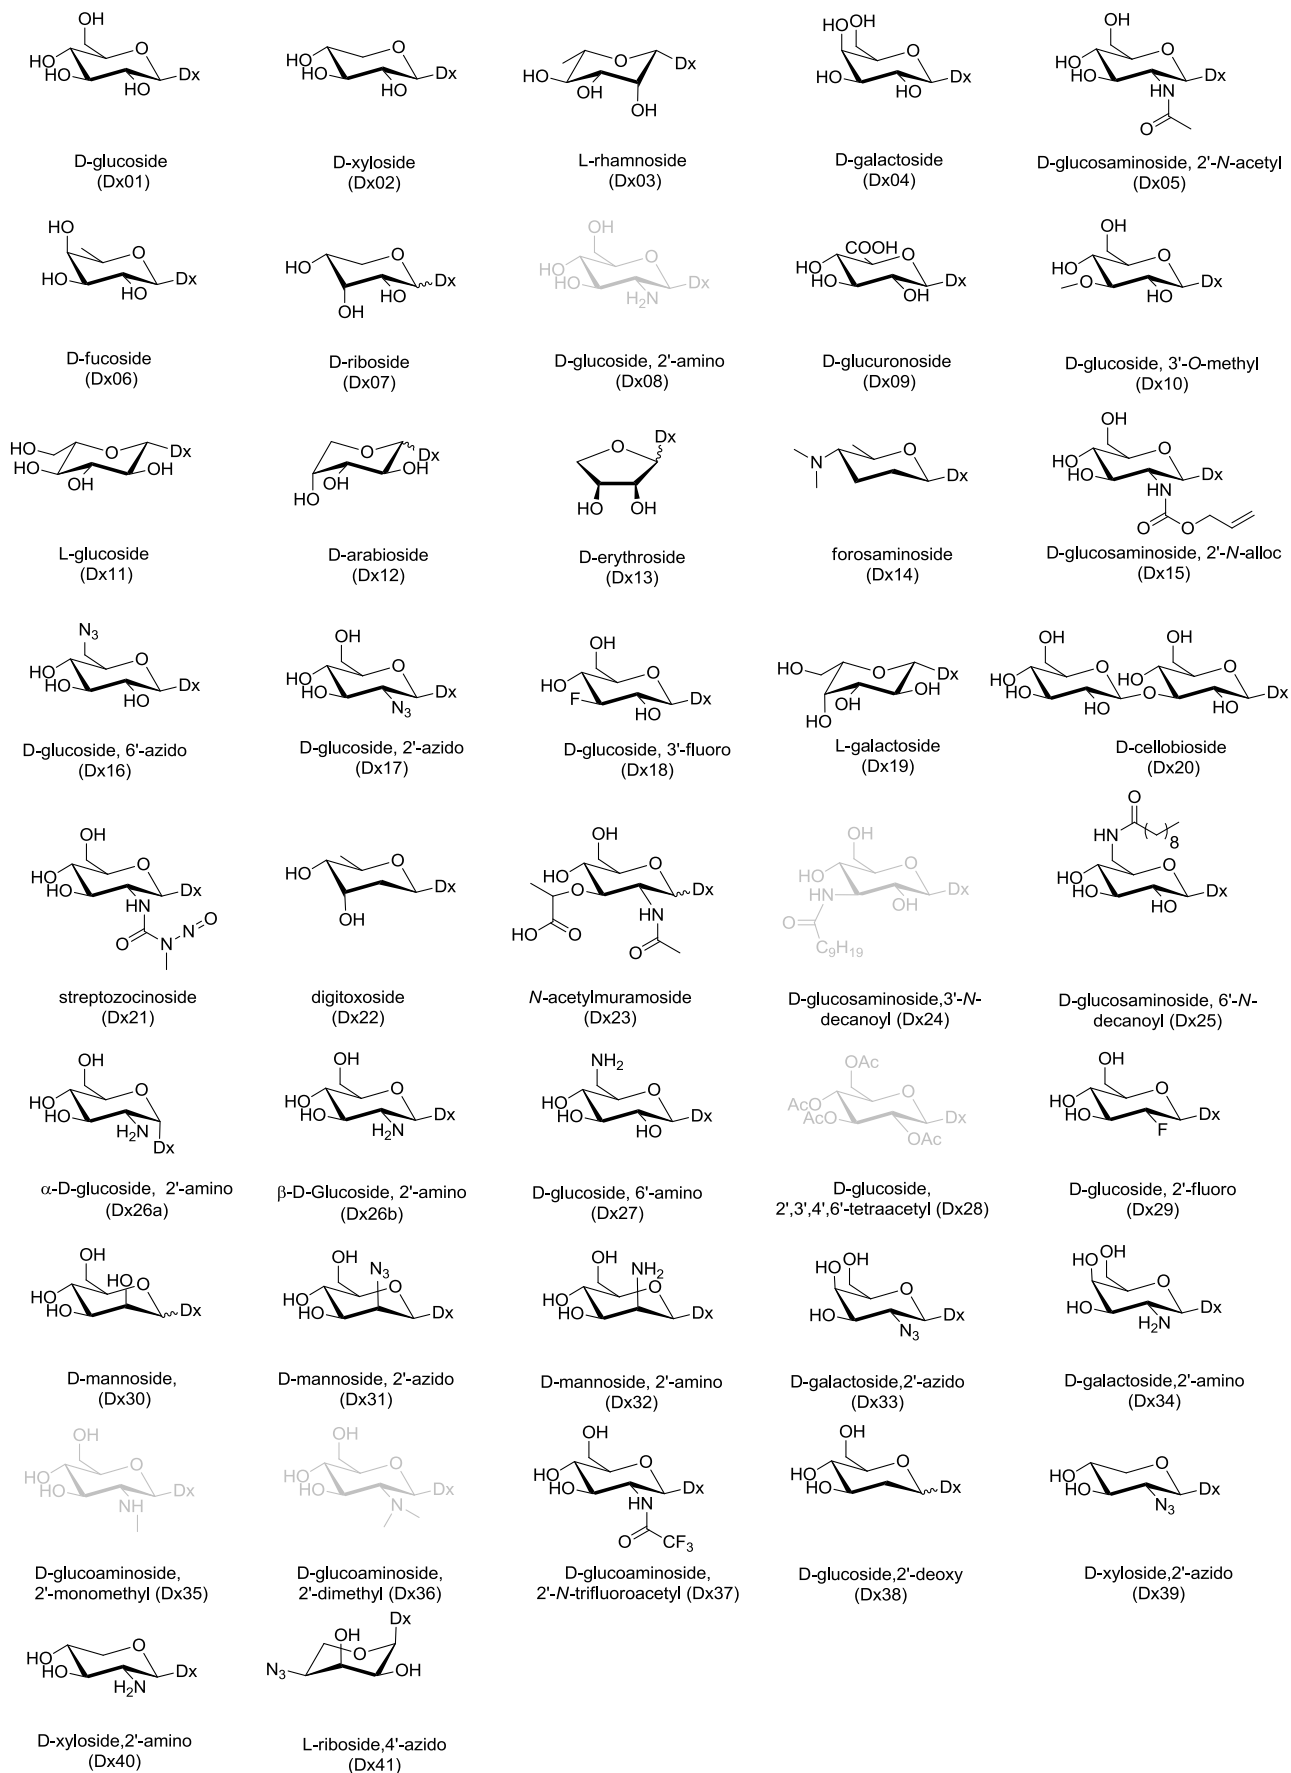

**Figure S1.** Doxycycline neoglycoside library (Grey colored neoglycosides represent failed reactions)

**Table S1.** Key characterization data for doxycycline neoglycosides.

| Neoglycoside (see Figure 1) | $\alpha$ anomeric H1 |                  | $\beta$ anomeric H1 |                | $\alpha/\beta$ ration | H 2 <sup>a</sup><br>$\Delta$ (ppm) | HRESI [M+H] m/z |            |
|-----------------------------|----------------------|------------------|---------------------|----------------|-----------------------|------------------------------------|-----------------|------------|
|                             | $\Delta$ (ppm)       | $J$ (Hz)         | $\Delta$ (ppm)      | $J$ (Hz)       |                       |                                    | Measured        | Calculated |
| <b>Dx01</b>                 | n.d <sup>b</sup>     | n.d <sup>b</sup> | 4.26 ppm            | 8.7 Hz         | $\beta$ only          | 3.38 ppm                           | 709.25484       | 709.2563   |
| <b>Dx02</b>                 | n.d <sup>b</sup>     | n.d <sup>b</sup> | 4.19 ppm            | 8.8 Hz         | $\beta$ only          | 3.36 ppm                           | 679.24703       | 679.2457   |
| <b>Dx03</b>                 | n.d <sup>b</sup>     | n.d <sup>b</sup> | 4.44 ppm            | 1.0 Hz         | $\beta$ only          | 3.59 ppm                           | 693.26213       | 693.2614   |
| <b>Dx04</b>                 | n.d <sup>b</sup>     | n.d <sup>b</sup> | 4.26 ppm            | 9.0 Hz         | $\beta$ only          | 3.55 ppm                           | 709.25597       | 709.2563   |
| <b>Dx05</b>                 | n.d <sup>b</sup>     | n.d <sup>b</sup> | 4.42 ppm            | 10.0 Hz        | $\beta$ only          | 3.72 ppm                           | 750.28313       | 750.2828   |
| <b>Dx06</b>                 | n.d <sup>b</sup>     | n.d <sup>b</sup> | 4.22 ppm            | 8.6 Hz         | $\beta$ only          | n.d <sup>b</sup>                   | 693.26212       | 693.2641   |
| <b>Dx07</b>                 | 4.73 ppm             | 3.9 Hz           | 4.54 ppm            | 8.8 Hz         | $\alpha/\beta=1/4$    | n.d <sup>b</sup>                   | 679.24632       | 679.2457   |
| <b>Dx09</b>                 | n.d <sup>b</sup>     | n.d <sup>b</sup> | 4.56 ppm            | 6.1 Hz         | $\beta$ only          | 3.43 ppm                           | 737.24934       | 737.2512   |
| <b>Dx10</b>                 | n.d <sup>b</sup>     | n.d <sup>b</sup> | 4.27 ppm            | 9.3 Hz         | $\beta$ only          | 3.39 ppm                           | 723.27208       | 723.2719   |
| <b>Dx11</b>                 | n.d <sup>b</sup>     | n.d <sup>b</sup> | 4.26 ppm            | 8.2 Hz         | $\beta$ only          | 3.37 ppm                           | 709.25706       | 709.2563   |
| <b>Dx12</b>                 | 4.61 ppm             | 5.2 Hz           | 4.18 ppm            | 9.0 Hz         | $\alpha/\beta=1/5$    | n.d <sup>b</sup>                   | 679.24591       | 679.2457   |
| <b>Dx13</b>                 | 4.22 ppm             | 4.5 Hz           | 4.05 ppm            | 5.2 Hz         | $\alpha/\beta=3/1$    | n.d <sup>b</sup>                   | 649.23770       | 649.2352   |
| <b>Dx14</b>                 | n.d <sup>b</sup>     | n.d <sup>b</sup> | 4.50 ppm            | 9.9 Hz         | $\beta$ only          | 1.86 ppm                           | 688.31860       | 688.3188   |
| <b>Dx15</b>                 | 4.69 ppm             | 4.5 Hz           | 4.46 ppm            | 9.4 Hz         | $\alpha/\beta=1/1$    | 3.33 ppm/<br>3.40 ppm              | 792.29846       | 792.2934   |
| <b>Dx16</b>                 | n.d <sup>b</sup>     | n.d <sup>b</sup> | 4.36 ppm            | 8.5 Hz         | $\beta$ only          | 3.34 ppm                           | 734.26611       | 734.2628   |
| <b>Dx17</b>                 | 4.80 ppm             | singlet          | 4.27 ppm            | 9.5 Hz         | $\alpha/\beta=1/1$    | 3.42 ppm                           | 734.26129       | 734.2628   |
| <b>Dx18</b>                 | n.d <sup>b</sup>     | n.d <sup>b</sup> | 4.29 ppm            | 9.3 Hz         | $\beta$ only          | 3.65 ppm                           | 711.25146       | 711.2520   |
| <b>Dx19</b>                 | n.d <sup>b</sup>     | n.d <sup>b</sup> | 4.26 ppm            | 9.3 Hz         | $\beta$ only          | 3.62 ppm                           | 709.25671       | 709.2563   |
| <b>Dx20</b>                 | n.d <sup>b</sup>     | n.d <sup>b</sup> | 4.30 ppm            | 9.2 Hz         | $\beta$ only          | 3.48 ppm                           | 871.31004       | 871.3091   |
| <b>Dx21</b>                 | 4.79                 | singlet          | 4.65 ppm            | 10.0 Hz        | $\alpha/\beta=1/1$    | n.d <sup>b</sup>                   | 794.28488       | 794.2839   |
| <b>Dx22</b>                 | n.d <sup>b</sup>     | n.d <sup>b</sup> | 4.00 ppm            | 6.1 Hz /2.2 Hz | $\beta$ only          | 2.61 ppm/<br>2.79 ppm              | 677.26693       | 677.2665   |
| <b>Dx23</b>                 | 4.74 ppm             | 3.2Hz            | 4.56 ppm            | 9.7 Hz         | $\alpha/\beta=1/1$    | n.d <sup>b</sup>                   | 822.30525       | 822.3040   |
| <b>Dx25</b>                 | n.d <sup>b</sup>     | n.d <sup>b</sup> | 4.26 ppm            | 8.8 Hz         | $\beta$ only          | 3.39 ppm                           | 862.41238       | 862.4080   |
| <b>Dx26a</b>                | 5.30 ppm             | 3.5 Hz           | n.d.                | n.d.           | $\alpha$ only         | 3.05 ppm                           | 708.27445       | 708.2723   |
| <b>Dx26b</b>                | n.d <sup>b</sup>     | n.d <sup>b</sup> | 4.55 ppm            | 10.0 Hz        | $\beta$ only          | 3.08 ppm                           | 708.27352       | 708.2723   |
| <b>Dx27</b>                 | n.d <sup>b</sup>     | n.d <sup>b</sup> | 4.37 ppm            | 8.8 Hz         | $\beta$ only          | 3.41 ppm                           | 708.27284       | 708.2723   |
| <b>Dx29</b>                 | n.d <sup>b</sup>     | n.d <sup>b</sup> | 4.40 ppm            | 9.0 Hz         | $\beta$ only          | 3.68 ppm                           | 711.25609       | 711.2520   |
| <b>Dx30</b>                 | 4.68 ppm             | 0.5 Hz           | 4.34 ppm            | 2.3 Hz         | $\alpha/\beta=1/2$    | n.d <sup>b</sup>                   | 709.25859       | 709.2563   |
| <b>Dx31</b>                 | 4.77 ppm             | 0.5 Hz           | 4.44 ppm            | 2.9 Hz         | $\alpha/\beta=1/1$    | n.d <sup>b</sup>                   | 734.26404       | 734.2638   |
| <b>Dx32</b>                 | 4.96 ppm             | 0.5 Hz           | 4.65 ppm            | 3.5 Hz         | $\alpha/\beta=1/1$    | n.d <sup>b</sup>                   | 708.27411       | 708.2723   |
| <b>Dx33</b>                 | n.d <sup>b</sup>     | n.d <sup>b</sup> | 4.24 ppm            | 9.3 Hz         | $\beta$ only          | 3.62 ppm                           | 734.26589       | 734.2628   |
| <b>Dx34</b>                 | n.d <sup>b</sup>     | n.d <sup>b</sup> | 4.50 ppm            | 9.9 Hz         | $\beta$ only          | 3.34 ppm                           | 708.27445       | 708.2723   |
| <b>Dx37</b>                 | n.d <sup>b</sup>     | n.d <sup>b</sup> | 4.73 ppm            | 7.9 Hz         | $\beta$ only          | 4.15 ppm                           | 804.25463       | 804.2546   |
| <b>Dx38</b>                 | 5.20 ppm             | 6.3 Hz           | 4.63 ppm            | 4.8 Hz         | $\alpha/\beta=1/1$    | n.d <sup>b</sup>                   | 693.26248       | 693.2641   |
| <b>Dx39</b>                 | n.d <sup>b</sup>     | n.d <sup>b</sup> | 4.19 ppm            | 9.0 Hz         | $\beta$ only          | 3.28 ppm                           | 704.25084       | 704.2522   |
| <b>Dx40</b>                 | n.d <sup>b</sup>     | n.d <sup>b</sup> | 4.47 ppm            | 10.0 Hz        | $\beta$ only          | 3.08 ppm                           | 678.25815       | 678.2617   |
| <b>Dx41</b>                 | n.d <sup>b</sup>     | n.d <sup>b</sup> | 4.22 ppm            | 4.4 Hz         | $\beta$ only          | 3.47 ppm                           | 704.25589       | 704.2522   |

<sup>a</sup> Identification based upon gCOSY coupling with anomeric proton. <sup>b</sup> Not determined

**Table S2. Neoglycoside antibacterial assays (MIC in  $\mu\text{g/mL}$ ).**

| Neoglycoside<br>(Fig. 1) | Sugar Utilized                                          | <i>E. coli</i><br>25922 | <i>E. coli</i><br>1-849 | <i>S. aureus</i><br>R2507 |
|--------------------------|---------------------------------------------------------|-------------------------|-------------------------|---------------------------|
| 1                        | none                                                    | 1                       | 8                       | 2                         |
| 2                        | none                                                    | 1                       | 2                       | 4                         |
| 4                        | none                                                    | 4                       | 8                       | 4                         |
| Dx01                     | D-glucose (5)                                           | 64                      | >128                    | 64                        |
| Dx02                     | D-xylose (6)                                            | 8                       | 64                      | 32                        |
| Dx03                     | L-rhamnose (7)                                          | 32                      | >128                    | 64                        |
| Dx04                     | D-galactose (8)                                         | 4                       | >128                    | 64                        |
| Dx05                     | <i>N</i> -acetyl-D-glucosamine (9)                      | 8                       | 64                      | 64                        |
| Dx06                     | D-fucose (10)                                           | 16                      | >128                    | >128                      |
| Dx07                     | D-ribose (11)                                           | 4                       | >128                    | 64                        |
| Dx09                     | D-glucuronic acid (13)                                  | 16                      | >128                    | 64                        |
| Dx10                     | 3- <i>O</i> -methyl-D-glucose (14)                      | >128                    | >128                    | >128                      |
| Dx11                     | L-glucose (15)                                          | 8                       | >128                    | 64                        |
| Dx12                     | D-arabinose (16)                                        | 8                       | 64                      | 32                        |
| Dx13                     | D-erythrose (17)                                        | 4                       | 64                      | 32                        |
| Dx14                     | forosamine (18)                                         | 4                       | 32                      | 16                        |
| Dx15                     | 2-deoxy-2- <i>N</i> -alloc-D-glucosamine (19)           | 8                       | 16                      | 8                         |
| Dx16                     | 6-deoxy-6-azido-D-glucose (20)                          | 8                       | 64                      | 64                        |
| Dx17                     | 2-deoxy-2-azido-D-glucose (21)                          | 16                      | 8                       | 8                         |
| Dx18                     | 3-deoxy-3-fluoro-D-glucose (22)                         | 32                      | >64                     | >64                       |
| Dx19                     | L-galactose (23)                                        | 8                       | 64                      | 32                        |
| Dx20                     | D-cellobiose (24)                                       | 16                      | 64                      | 64                        |
| Dx21                     | streptozocin (25)                                       | 16                      | 64                      | 32                        |
| Dx22                     | digitoxose (26)                                         | 8                       | 32                      | 32                        |
| Dx23                     | <i>N</i> -acetylmuramic acid (27)                       | 8                       | 32                      | 16                        |
| Dx25                     | 6-deoxy-6- <i>N</i> -decanoyl-D-glucosamine (29)        | >128                    | >128                    | >128                      |
| Dx26a                    | 2-deoxy-2-azido-D-glucose (21)                          | 4                       | 4                       | 4                         |
| Dx26b                    | 2-deoxy-2-azido-D-glucose (21)                          | 8                       | 32                      | 32                        |
| Dx27                     | 6-deoxy-6-azido-D-glucose (20)                          | 8                       | 32                      | 32                        |
| Dx29                     | 2-deoxy-2-fluoro-D-glucose (31)                         | 8                       | 64                      | 8                         |
| Dx30                     | D-mannose (32)                                          | 4                       | >128                    | 32                        |
| Dx31                     | 2-deoxy-2-azido-D-mannose (33)                          | 32                      | >128                    | 32                        |
| Dx32                     | 2-deoxy-2-azido-D-mannose (33)                          | 4                       | 32                      | 32                        |
| Dx33                     | 2-deoxy-2-azido-D-galactose (34)                        | 16                      | >128                    | 8                         |
| Dx34                     | 2-deoxy-2-azido-D-galactose (34)                        | 8                       | 64                      | 32                        |
| Dx37                     | 2-deoxy-2- <i>N</i> -trifluoroacetyl-D-glucosamine (37) | 4                       | 32                      | 16                        |
| Dx38                     | 2-deoxy-D-glucose (38)                                  | 16                      | >128                    | 32                        |
| Dx39                     | 2-deoxy-2-azido-D-xylose (39)                           | 16                      | 64                      | 32                        |
| Dx40                     | 2-deoxy-2-azido-D-xylose (39)                           | 8                       | 64                      | 32                        |
| Dx41                     | 4-deoxy-4-azido-L-ribose (40)                           | 16                      | 64                      | 32                        |

**Table S3.** Neoglycoside single dose (10  $\mu$ M) cytotoxicity assays.

| Neoglycoside<br>(see Figure 1) | Sugar utilized                                                   | A549 viability<br>(%) | IMR 90 viability<br>(%) |
|--------------------------------|------------------------------------------------------------------|-----------------------|-------------------------|
| <b>1</b>                       | none                                                             | <b>97.6</b>           | <b>98.3</b>             |
| <b>2</b>                       | none                                                             | <b>99.3</b>           | <b>103.3</b>            |
| <b>4</b>                       | none                                                             | <b>95.9</b>           | <b>99.2</b>             |
| <b>Dx01</b>                    | D-glucose ( <b>5</b> )                                           | <b>96.6</b>           | <b>98.5</b>             |
| <b>Dx02</b>                    | D-xylose ( <b>6</b> )                                            | <b>101</b>            | <b>104.1</b>            |
| <b>Dx03</b>                    | L-rhamnose ( <b>7</b> )                                          | <b>98</b>             | <b>106.8</b>            |
| <b>Dx09</b>                    | D-glucuronic acid ( <b>13</b> )                                  | <b>98.9</b>           | <b>98.8</b>             |
| <b>Dx12</b>                    | D-arabinose ( <b>16</b> )                                        | <b>97.2</b>           | <b>101.7</b>            |
| <b>Dx13</b>                    | D-erythrose ( <b>17</b> )                                        | <b>98.2</b>           | <b>99.3</b>             |
| <b>Dx14</b>                    | forosamine ( <b>18</b> )                                         | <b>96.9</b>           | <b>100.7</b>            |
| <b>Dx15</b>                    | 2-deoxy-2- <i>N</i> -alloc-D-glucosamine ( <b>19</b> )           | <b>98.8</b>           | <b>97.6</b>             |
| <b>Dx23</b>                    | <i>N</i> -acetylmuramic acid ( <b>27</b> )                       | <b>97.7</b>           | <b>104.4</b>            |
| <b>Dx26a</b>                   | 2-deoxy-2-azido-D-glucose ( <b>21</b> )                          | <b>99.1</b>           | <b>94.6</b>             |
| <b>Dx26b</b>                   | 2-deoxy-2- azido-D-glucose ( <b>21</b> )                         | <b>95.6</b>           | <b>101.7</b>            |
| <b>Dx32</b>                    | 2-deoxy-2-azido-D-mannose ( <b>33</b> )                          | <b>97.1</b>           | <b>98.9</b>             |
| <b>Dx37</b>                    | 2-deoxy-2- <i>N</i> -trifluoroacetyl-D-glucosamine ( <b>37</b> ) | <b>98.7</b>           | <b>109.1</b>            |
| <b>Dx41</b>                    | 4-deoxy-4-azido-L-ribose ( <b>40</b> )                           | <b>98.5</b>           | <b>101.9</b>            |

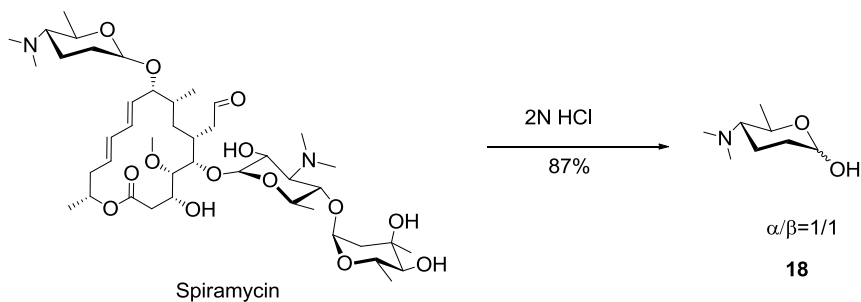

**Figure S2.** Synthesis of forosamine **18**.

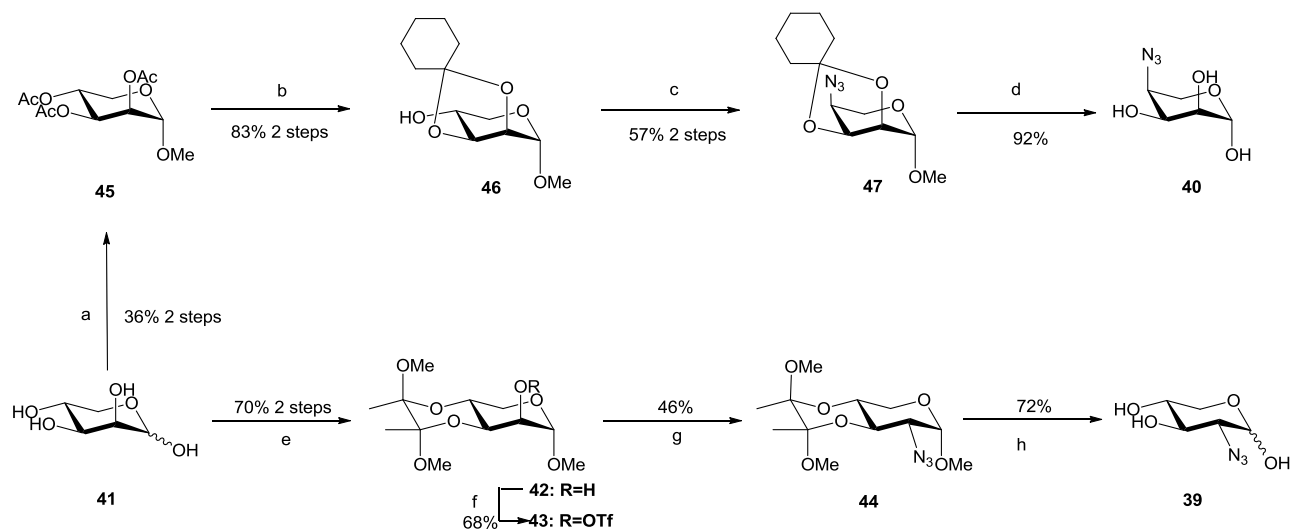

(a) (1) MeOH, HCl, 48h, (2) Ac<sub>2</sub>O, DMAP, Et<sub>3</sub>N, CH<sub>2</sub>Cl<sub>2</sub>; (b) (1) NaOMe, MeOH/CH<sub>2</sub>Cl<sub>2</sub>, (2) Cyclohexanone dimethyl ketal, TsOH, CH<sub>3</sub>CN; (c) (1) Tf<sub>2</sub>O, Pyridine, CH<sub>2</sub>Cl<sub>2</sub>, (2) NaN<sub>3</sub>, DMF; (d) 1 N HCl, 90°C, 3 h; (e) (1) MeOH, AcCl, 1 h, reflux, (2) Butanedione, HC(OMe)<sub>3</sub>, CSA, MeOH, Reflux, 3 h; (f) (1) Tf<sub>2</sub>O, Pyridine, CH<sub>2</sub>Cl<sub>2</sub>, (2) NaN<sub>3</sub>, DMF (g) NaN<sub>3</sub>, DMF, 80°C; (h) 2 N HCl, 90°C, 6h

**Figure S3.** Synthesis of 2-azido-D-xylose **39** and 4-azido-L-ribose **40**

## Supplementary Methods

**Forosamine (18).**<sup>1</sup> Spiramycin (400 mg, 0.46 mmol) was refluxed for 16 h in 10 mL of 2 N HCl. The mixture was cooled to rt and filtered. The filtrate was neutralized to pH 7 by saturated NaOH solution and lyophilized. The residue was then extracted with 10 mL EtOH and the EtOH layer was concentrated under reduced pressure. The residue was purified by normal phase column chromatography using 10% MeOH/CH<sub>2</sub>Cl<sub>2</sub> (with 0.5% Et<sub>3</sub>N) to give forosamine (64 mg, 0.40 mmol, 87 %) as a white powder. <sup>1</sup>H NMR (500 MHz, CD<sub>3</sub>OD) δ 5.22 (dd, *J* = 2.5, 2.0 Hz, 1 H, 1-Hα), 4.72 (dd, *J* = 9.0, 2.0 Hz, 1 H, 1-Hβ), 4.24 (dq, *J* = 9.5, 6.5 Hz, 1 H, 5-Hα), 3.79 (dq, *J* = 9.5, 6.5 Hz, 1 H, 5-Hβ), 2.71 (s, 6 H, N(CH<sub>3</sub>)α), 2.62 (s, 6 H, N(CH<sub>3</sub>)β), 1.42–2.38 (m, 5 H + 5 H, 2-H, 3-H, 4-H), 1.32 (d, *J* = 6.5 Hz, 3 H, 6-Hβ), 1.25 (d, *J* = 6.5 Hz, 3 H, 6-Hα); <sup>13</sup>C NMR (100 MHz, CD<sub>3</sub>OD) δ 95.6, 90.2, 74.2, 66.3, 65.6, 64.3, 39.6, 39.5, 32.0 (2C), 30.0 (2C), 19.1 (2C), 18.1, 15.2; HRESIMS *m/z* 160.1336 [M + H]<sup>+</sup> (Calcd for C<sub>8</sub>H<sub>17</sub>NO 160.1332).

**2-deoxy-2-azido-D-xylopyranoside (39).** α/β=2/3 The solution of **44** (0.12 g, 0.40 mmol) in 1 mL 2 N HCl was heated under 90 °C for 6 h. After cool down of the solution, it was added with charcoal and NaHCO<sub>3</sub> (0.168 g, 2 mmol) and kept stirring until the evolution of gas stopped and tested neutral by PH paper. The solvent was removed and lyophilized to dry. The dried residue was loaded to a short column packed with layers of celite and silica gel and it was washed with 200 mL EtOAc, EtOAc/MeOH = 90/10, and CH<sub>2</sub>Cl<sub>2</sub>/MeOH = 80/20 solutions, respectively. After the 200 mL CH<sub>2</sub>Cl<sub>2</sub>/MeOH = 80/20 effluent was collected and removed solvent, the product (0.05 g, 0.29 mmol) was obtained with a yield of 72%. Colorless oil: <sup>1</sup>H NMR (CD<sub>3</sub>OD, 400 MHz) δ 5.12 (d, *J* = 3.5 Hz, αH1, 1H), 4.42 (d, *J* = 8.0 Hz, βH1, 1 H), 3.9 (m, 2 H), 3.8 (m, 2 H), 3.7 (m, 2 H), 3.6 (m, 2 H), 3.5 (m, 4 H), 3.2 (m, 2 H), 3.1 (m, 2 H); <sup>13</sup>C NMR (CD<sub>3</sub>OD, 100 MHz) δ 96.8, 92.3, 75.3, 71.5, 70.8, 70.0, 68.2, 65.9, 64.1, 61.3; HRESI *m/z* 198.04854 [M + Na]<sup>+</sup> (Calcd for C<sub>5</sub>H<sub>9</sub>N<sub>3</sub>NaO<sub>4</sub> 198.0485).

**4-deoxy-4-azido-α-L-ribosepyranoside (40).** The solution of **47** (0.20 g, 0.74 mmol) in 2 mL 1 N HCl was heated under 90 °C for 3 hours. After cool down of the solution, it was added with charcoal and NaHCO<sub>3</sub> (0.168 g, 2 mmol) and kept stirring until the evolution of gas stopped and tested neutral by PH paper. The solvent was removed and lyophilized to dry and formed a white powder. The white powder was loaded on a short column packed with layers of celite and silica gel and washed with 200 mL EtOAc, EtOAc/MeOH = 90/10, and CH<sub>2</sub>Cl<sub>2</sub>/MeOH = 80/20 solutions, respectively. After the CH<sub>2</sub>Cl<sub>2</sub>/MeOH = 80/20 effluents was collected and removed solvent, the product (0.12 g, 0.69 mmol) was obtained with a yield of 92%. Colorless oil: <sup>1</sup>H NMR (CD<sub>3</sub>OD, 500 MHz) δ 4.29 (d, *J* = 3.2 Hz, 1 H), 4.05 - 4.11 (m, 1 H), 3.99 - 4.04 (m, 1 H), 3.64 (dd, *J* = 13.2, 3.9 Hz, 1 H), 3.35 - 3.41 (m, 1 H), 3.14 (dd, *J* = 13.1, 2.3 Hz, 1 H); <sup>13</sup>C NMR (CD<sub>3</sub>OD, 125 MHz) δ 71.3, 70.3, 67.4, 67.3, 44.9; HRESI *m/z* 198.04834 [M + Na]<sup>+</sup> (Calcd for C<sub>5</sub>H<sub>9</sub>N<sub>3</sub>NaO<sub>4</sub> 198.0485).

**1-methyl-3,4-O-(1,2-dimethoxy-1,2-dimethyl-1,2-ethanediyl)-α-D-lyxopyranoside (42).** To a suspension of D-lyxose **41** (2 g, 13.3 mmol) in 60 mL MeOH, 1 mL acetyl chloride (15.5 mmol) was added dropwise and the resulting solution was reflux for 1 h. The reaction was cooled down to room temperature and was quenched by adding NaHCO<sub>3</sub> until the evolution of gas stopped. After filtration through celite and removal of the solvent, the residue was dissolved into 50 mL MeOH and to this was added anhydrous trimethyl orthoformate (10 mL, 91 mmol) and butanedione (4 mL, 46 mmol). To this was added camphorsulfonic acid (1.08 g, 4.6 mmol) with stirring and the solution was reflux for 3 h until the reaction was complete based upon TLC. The reaction was quenched by adding Et<sub>3</sub>N (0.65 mL, 4.6 mmol). After the removal of the solvent *in vacuo*, the residue was diluted with EtOAc, washed with

<sup>1</sup>Procedure modified from that of Kuehne and Benson (Kuehne, M. E.; Benson, B. W. *J. Am. Chem. Soc.* **1965**, *87*, 4660). The spectral data for isolated forosamine was identical to that previously reported for synthetic standard (Tietze, L. F.; Böhnke, N.; Dietz, S. *Org. Lett.* **2009**, *11*, 2948).

NaHCO<sub>3</sub>(sat), water and brine, dried over Na<sub>2</sub>SO<sub>4</sub>, and the solvent removed. The crude residue was purified by normal phase silica gel column (Gradient: Hexane/EtOAc = 90/10 to Hexane/EtOAc = 10/90). The product (2.58 g, 9.3 mmol) was obtained with a yield of 70% after two steps. White crystal: <sup>1</sup>H NMR (CDCl<sub>3</sub>, 400 MHz) δ 4.69 (d, *J* = 1.2 Hz, 1 H), 4.1 - 4.2 (m, 1 H), 3.9 (m, 1 H), 3.6 (m, 2 H), 3.3 (m, 1 H), 3.37 (s, 3 H), 3.27 (s, 3 H), 3.26 (s, 3 H), 2.68 (s, 1 H), 1.33 (s, 3 H), 1.28 (s, 3 H); <sup>13</sup>C NMR (CDCl<sub>3</sub>, 100 MHz) δ 101.3, 100.7, 99.9, 69.8, 68.8, 63.0, 60.6, 55.1, 48.2, 48.1, 17.95, 17.93; HRESI *m/z* 301.12519 [M + Na]<sup>+</sup> (Calcd for C<sub>12</sub>H<sub>22</sub>NaO<sub>7</sub> 301.1258).

**1-methyl-2-triflyl-3,4-O-(1,2-dimethoxy-1,2-dimethyl-1,2-ethanediyl)-α-D-lyxopyranoside (43).** To a solution of **42** (2.0 g, 7.2 mmol) and pyridine (0.92 mL, 11.5 mmol) in anhydrous CH<sub>2</sub>Cl<sub>2</sub> (100 mL) cooled to 0 °C was added Tf<sub>2</sub>O (1.81 mL, 10.8 mmol) in dropwise fashion. The reaction was stirred at 0 °C for 30 min until reaction was complete based upon TLC. The reaction was diluted with CH<sub>2</sub>Cl<sub>2</sub> and washed with water, NaHCO<sub>3</sub>(sat), and brine and organics dried over Na<sub>2</sub>SO<sub>4</sub> and concentrated to 10 mL. The concentrated CH<sub>2</sub>Cl<sub>2</sub> solution was added to a stirring 200 mL solution of NaN<sub>3</sub> (1.40 g, 21.6 mmol) in DMF and the reaction was stirred at room temperature for 24 h. The reaction was filtered through celite and washed with EtOAc (50 mL, x3). After the removal of the solvent, the residue was purified by normal phase silica gel column (Gradient: Hexane/EtOAc = 100/0 to Hexane/EtOAc = 50/50). The product **43** (2.0 g, 4.9 mmol) was obtained with a yield of 68%. White oil: <sup>1</sup>H NMR (CDCl<sub>3</sub>, 500 MHz) δ 4.8 (m, 1 H), 4.81 (d, *J* = 1.5 Hz, 1 H), 4.1 (m, 2 H), 3.6 - 3.7 (m, 2 H), 3.40 (s, 3 H), 3.26 (s, 3 H), 3.25 (s, 3 H), 1.28 (s, 3 H), 1.27 (s, 3 H); <sup>13</sup>C NMR (CDCl<sub>3</sub>, 125 MHz) δ 120.0 (q, 1 C), 100.9, 100.1, 99.1, 83.0, 65.8, 62.7, 60.7, 55.5, 48.4, 48.2, 17.8, 17.5; HRESI *m/z* 433.07457 [M + Na]<sup>+</sup> (Calcd for C<sub>13</sub>H<sub>21</sub>F<sub>3</sub>O<sub>9</sub>SNa 433.0751).

**1-methyl-2-deoxy-2-azido-3,4-O-(1,2-dimethoxy-1,2-dimethyl-1,2-ethanediyl)-α-D-xylopyranoside (44).** A solution of **43** (2.0 g, 4.9 mmol) and NaN<sub>3</sub> (1.40 g, 21.6 mmol) in 100 mL DMF was heated to 80 °C for 12 h. The reaction was cooled down to room temperature and was filtered and washed with 200 mL of EtOAc. After the removal of solvent under reduced pressure, the residue was purified by normal phase silica gel column (Gradient: Hexane/EtOAc = 100/0 to Hexane/EtOAc = 50/50). The product (0.68 g, 2.24 mmol) was obtained with a yield of 46%. White solid: <sup>1</sup>H NMR (CDCl<sub>3</sub>, 500 MHz) δ 4.73 (d, *J* = 3.4 Hz, 1 H), 4.18 (dd, *J* = 10.6, 9.6 Hz, 1 H), 3.80 (ddd, *J* = 10.9, 9.6, 5.4 Hz, 1 H), 3.66 (t, *J* = 10.6 Hz, 1 H), 3.6 (m, 1 H), 3.34 (dd, *J* = 3.3, 1.6 Hz, 1 H), 3.41 (s, 3 H), 3.36 (s, 3 H), 3.28 (s, 3 H), 1.35 (s, 3 H), 1.30 (s, 3 H); <sup>13</sup>C NMR (CDCl<sub>3</sub>, 100 MHz) δ 100.4, 100.0, 99.5, 68.2, 66.9, 60.4, 59.8, 55.4, 48.5, 48.2, 17.9, 17.7; HRESI *m/z* 326.13206 [M + Na]<sup>+</sup> (Calcd for C<sub>12</sub>H<sub>21</sub>N<sub>3</sub>NaO<sub>6</sub> 326.1323).

**1-methyl-2,3,4-acetyl-α-D-lyxopyranoside (45).** To a suspension of D-lyxose **41** (1.0 g, 6.7 mmol) in 100 mL MeOH at 0 °C, HCl (0.4 mL) was added in dropwise fashion and the reaction was stirred at room temperature until the reaction was completed based upon TLC (2 days). The reaction was quenched by adding NaHCO<sub>3</sub> (1.0 g, 9.4 mmol) and stirred until the evolution of gas stopped. The mixture was filtered through celite and the solvent of the filtrate was removed *in vacuo* to give a sticky oil. To this oil was added 200 mL CH<sub>2</sub>Cl<sub>2</sub>, Et<sub>3</sub>N (4.5 mL, 32 mmol) and DMAP (0.1 g, 0.8 mmol), and Ac<sub>2</sub>O (1.9 mL, 20 mmol) was subsequently added in dropwise fashion and the reaction stirred at room temperature for 2 h. The reaction was quenched by diluting with EtOAc and adding NaHCO<sub>3</sub> (sat) solution followed by stirring for 1 h. The organic layer was washed with 1 N HCl, NaHCO<sub>3</sub>, H<sub>2</sub>O and brine, the organics were dried over Na<sub>2</sub>SO<sub>4</sub>, and upon removal of solvent the crude product was purified by normal phase silica gel column (Gradient: Hexane/EtOAc = 100:0 to Hexane/EtOAc = 40/60). The α anomer **45** (0.69 g, 2.38 mmol, 36%) and β anomer (0.64 g, 3.1 mmol, 33%) were chromatographically resolved under these conditions. The α anomer was a white powder: <sup>1</sup>H NMR (CDCl<sub>3</sub>, 400 MHz) δ 5.28 (dd, *J* = 9.7, 3.5 Hz, 1 H), 5.12 (m, 2 H), 4.59 (d, *J* = 2.5 Hz, 1 H), 3.83 (dd, *J* = 11.0, 5.4 Hz, 1 H), 3.56 (dd, *J* = 10.7, 9.9 Hz, 1 H), 3.36 (s, 3 H), 2.09 (s, 3 H), 2.00 (s, 3 H), 1.98 (s, 3 H); <sup>13</sup>C NMR (CDCl<sub>3</sub>, 100 MHz) δ 170.2, 170.1, 169.9, 98.8, 69.6, 68.6, 67.0, 59.8, 55.5, 21.01, 20.98, 20.93; HRESI *m/z* 313.08842 [M + Na]<sup>+</sup> (Calcd for C<sub>12</sub>H<sub>18</sub>NaO<sub>8</sub> 313.0894).



**1-methyl-2,3-O-cyclohexylidene- $\alpha$ -D-lyxopyranoside (46).** To the solution of **45** (0.69 g, 2.38 mmol) in 50 mL MeOH was added 0.2 M NaOMe solution and the reaction was stirred for 1 h. The reaction was quenched by adding Amberlite acidic resin and stirred for 15 min. Filtration and removal of the solvent gave the crude product which was dissolved in 50 mL CH<sub>3</sub>CN and to which was added TsOH (0.23 g, 1.21 mmol) and cyclohexanol dimethyl ketal (1.48 mL, 9.76 mmol). The reaction was stirred under room temperature for 4 h. The reaction was quenched by adding Et<sub>3</sub>N (0.34 mL, 2.44 mmol) and solvent removed under vacuum. The residue was diluted with EtOAc and washed with water and brine. The organics were dried over Na<sub>2</sub>SO<sub>4</sub> and solvent removed. Crude product was purified via normal phase silica gel column (Gradient: Hexane/EtOAc = 100/0 to Hexane/EtOAc = 50/50), to give 0.48 g of desired product (1.97 mmol 83% after 2 steps). White oil: <sup>1</sup>H NMR (CDCl<sub>3</sub>, 500 MHz)  $\delta$  4.66 (d, *J* = 2.7 Hz, 1 H), 4.21 (dd, *J* = 5.7, 4.8 Hz, 1 H), 4.11 (dd, *J* = 6.1, 2.7 Hz, 1 H), 3.8 (m, 2 H), 3.7 (m, 1 H), 3.46 (s, 3 H), 3.15 (d, *J* = 7.3 Hz, 1 H), 1.6 - 1.7 (m, 4 H), 1.5 - 1.6 (m, 4 H), 1.4 (m, 2 H); <sup>13</sup>C NMR (CDCl<sub>3</sub>, 125 MHz)  $\delta$  110.3, 100.3, 76.3, 74.3, 67.7, 63.0, 56.0, 37.6, 35.1, 25.2, 24.2, 23.8; HRESI *m/z* 267.11964 [M + Na]<sup>+</sup> (Calcd for C<sub>12</sub>H<sub>20</sub>NaO<sub>5</sub> 267.1203).

**1-methyl-2,3-O-cyclohexylidene-4-deoxy-4-azido- $\alpha$ -L-ribopyranoside (47).** To the solution of **46** (0.48 g, 1.97 mmol) and pyridine (0.25 mL, 3.2 mmol) in anhydrous CH<sub>2</sub>Cl<sub>2</sub> (100 mL) at 0 °C was added Tf<sub>2</sub>O (0.50 mL, 3.0 mmol) in dropwise fashion. The reaction was stirred at 0 °C until the reaction was complete based upon TLC (30 min). The reaction was diluted with CH<sub>2</sub>Cl<sub>2</sub> (100 mL) and the organics were washed with water, NaHCO<sub>3</sub> (sat), and brine, dried over Na<sub>2</sub>SO<sub>4</sub> and concentrated to 10 mL. The concentrated CH<sub>2</sub>Cl<sub>2</sub> solution was added to a stirring solution of NaN<sub>3</sub> (0.38 g, 5.9 mmol) in DMF (150 mL) and the reaction was stirred at room temperature for 24 h. The reaction was filtered through celite and washed with EtOAc (50 mL, x3). After the removal of the solvent, the crude residue was purified by silica gel column (Gradient: Hexane/EtOAc = 100/0 to Hexane/EtOAc = 60/40) to give 0.30 g of the desired product (1.12 mmol, 57% after 2 steps). White oil: <sup>1</sup>H NMR (CDCl<sub>3</sub>, 400 MHz)  $\delta$  4.5 (m, 1 H), 4.51 (d, *J* = 3.9 Hz, 1 H), 4.04 (dd, *J* = 6.2, 3.9 Hz, 1 H), 3.8 (m, 1 H), 3.7 - 3.8 (m, 2 H), 3.45 (s, 3 H), 1.7 - 1.8 (m, 2 H), 1.5 - 1.7 (m, 6 H), 1.4 (m, 2 H); <sup>13</sup>C NMR (CDCl<sub>3</sub>, 100 MHz)  $\delta$  111.5, 101.3, 75.1, 72.8, 60.3, 56.5, 54.8, 36.8, 34.9, 25.2, 24.2, 23.8; HRESI *m/z* 292.12601 [M + Na]<sup>+</sup> (Calcd for C<sub>12</sub>H<sub>19</sub>N<sub>3</sub>NaO<sub>4</sub> 292.1268).

**Table S4.** NMR spectra

| entry | spectra                                                                                                                                     | page |
|-------|---------------------------------------------------------------------------------------------------------------------------------------------|------|
| 1     | <sup>1</sup> H NMR of compound <b>2</b>                                                                                                     | S11  |
| 2     | gCOSY of compound <b>2</b>                                                                                                                  | S12  |
| 3     | <sup>13</sup> C NMR of compound <b>2</b>                                                                                                    | S13  |
| 4     | <sup>1</sup> H NMR of compound <b>4</b>                                                                                                     | S14  |
| 5     | gCOSY of compound <b>4</b>                                                                                                                  | S15  |
| 6     | <sup>13</sup> C NMR of Compound <b>4</b>                                                                                                    | S16  |
| 7     | <sup>1</sup> H NMR of 2-deoxy-2-azido-D-xylopyranoside ( <b>39</b> )                                                                        | S17  |
| 8     | <sup>13</sup> C NMR of 2-deoxy-2-azido-D-xylopyranoside ( <b>39</b> )                                                                       | S18  |
| 9     | <sup>1</sup> H NMR of α-4-deoxy-4-azido-L-ribosepyranoside ( <b>40</b> )                                                                    | S19  |
| 10    | <sup>13</sup> C NMR of α-4-deoxy-4-azido-L-ribosepyranoside ( <b>40</b> )                                                                   | S20  |
| 11    | <sup>1</sup> H NMR of 1-methyl-3,4- <i>O</i> -(1,2-dimethoxy-1,2-dimethyl-1,2-ethanediyl)-α-D-lyxopyranoside ( <b>42</b> )                  | S21  |
| 12    | <sup>13</sup> C NMR of 1-methyl-3,4- <i>O</i> -(1,2-dimethoxy-1,2-dimethyl-1,2-ethanediyl)-α-D-lyxopyranoside ( <b>42</b> )                 | S22  |
| 13    | <sup>1</sup> H NMR of 1-methyl-2-triflyl-3,4- <i>O</i> -(1,2-dimethoxy-1,2-dimethyl-1,2-ethanediyl)-α-D-lyxopyranoside ( <b>43</b> )        | S23  |
| 14    | <sup>13</sup> C NMR of 1-methyl-2-triflyl-3,4- <i>O</i> -(1,2-dimethoxy-1,2-dimethyl-1,2-ethanediyl)-α-D-lyxopyranoside ( <b>43</b> )       | S24  |
| 15    | <sup>1</sup> H NMR of 1-methyl-2-deoxy-2-azido-3,4- <i>O</i> -(1,2-dimethoxy-1,2-dimethyl-1,2-ethanediyl)-α-D-xylopyranoside ( <b>44</b> )  | S25  |
| 16    | gCOSY of 1-methyl-2-deoxy-2-azido-3,4- <i>O</i> -(1,2-dimethoxy-1,2-dimethyl-1,2-ethanediyl)-α-D-xylopyranoside ( <b>44</b> )               | S26  |
| 17    | <sup>13</sup> C NMR of 1-methyl-2-deoxy-2-azido-3,4- <i>O</i> -(1,2-dimethoxy-1,2-dimethyl-1,2-ethanediyl)-α-D-xylopyranoside ( <b>44</b> ) | S27  |
| 18    | <sup>1</sup> H NMR of 1-methyl-2,3,4-acetyl-α-D-lyxopyranoside ( <b>45</b> )                                                                | S28  |
| 19    | <sup>13</sup> C NMR of 1-methyl-2,3,4-acetyl-α-D-lyxopyranoside ( <b>45</b> )                                                               | S29  |
| 20    | <sup>1</sup> H NMR of 1-methyl-2,3- <i>O</i> -cyclohexylidene-α-D-lyxopyranoside( <b>46</b> )                                               | S30  |
| 21    | <sup>13</sup> C NMR of 1-methyl-2,3- <i>O</i> -cyclohexylidene-α-D-lyxopyranoside( <b>46</b> )                                              | S31  |
| 22    | <sup>1</sup> H NMR 1-methyl-2,3- <i>O</i> -cyclohexylidene-4-deoxy-4-azido-α-L-ribosepyranoside ( <b>47</b> )                               | S32  |
| 23    | gCOSY of 1-methyl-2,3- <i>O</i> -cyclohexylidene-4-deoxy-4-azido-α-L-ribosepyranoside ( <b>47</b> )                                         | S33  |
| 24    | <sup>13</sup> C NMR 1-methyl-2,3- <i>O</i> -cyclohexylidene-4-deoxy-4-azido-α-L-ribosepyranoside ( <b>47</b> )                              | S34  |

Archive directory: /export/home/jjzhang/vnmrsys/data  
Sample directory: 9aminodox\_28Mar2011

Pulse Sequence: s2pu1  
Solvent: CD3OD  
Temp. 25.0 C / 298.1 K  
File: PROTON  
INQVA-500 "nmr03"

Relax. delay 1.000 sec  
Pulse 45.0 degrees  
Acq. time 3.747 sec  
Width 8000.0 Hz  
16 repetitions  
OBSERVE H1, 499.7307858 MHz  
DATA PROCESSING  
Line broadening 0.5 Hz  
FT size 65536  
Total time 1 min, 16 sec

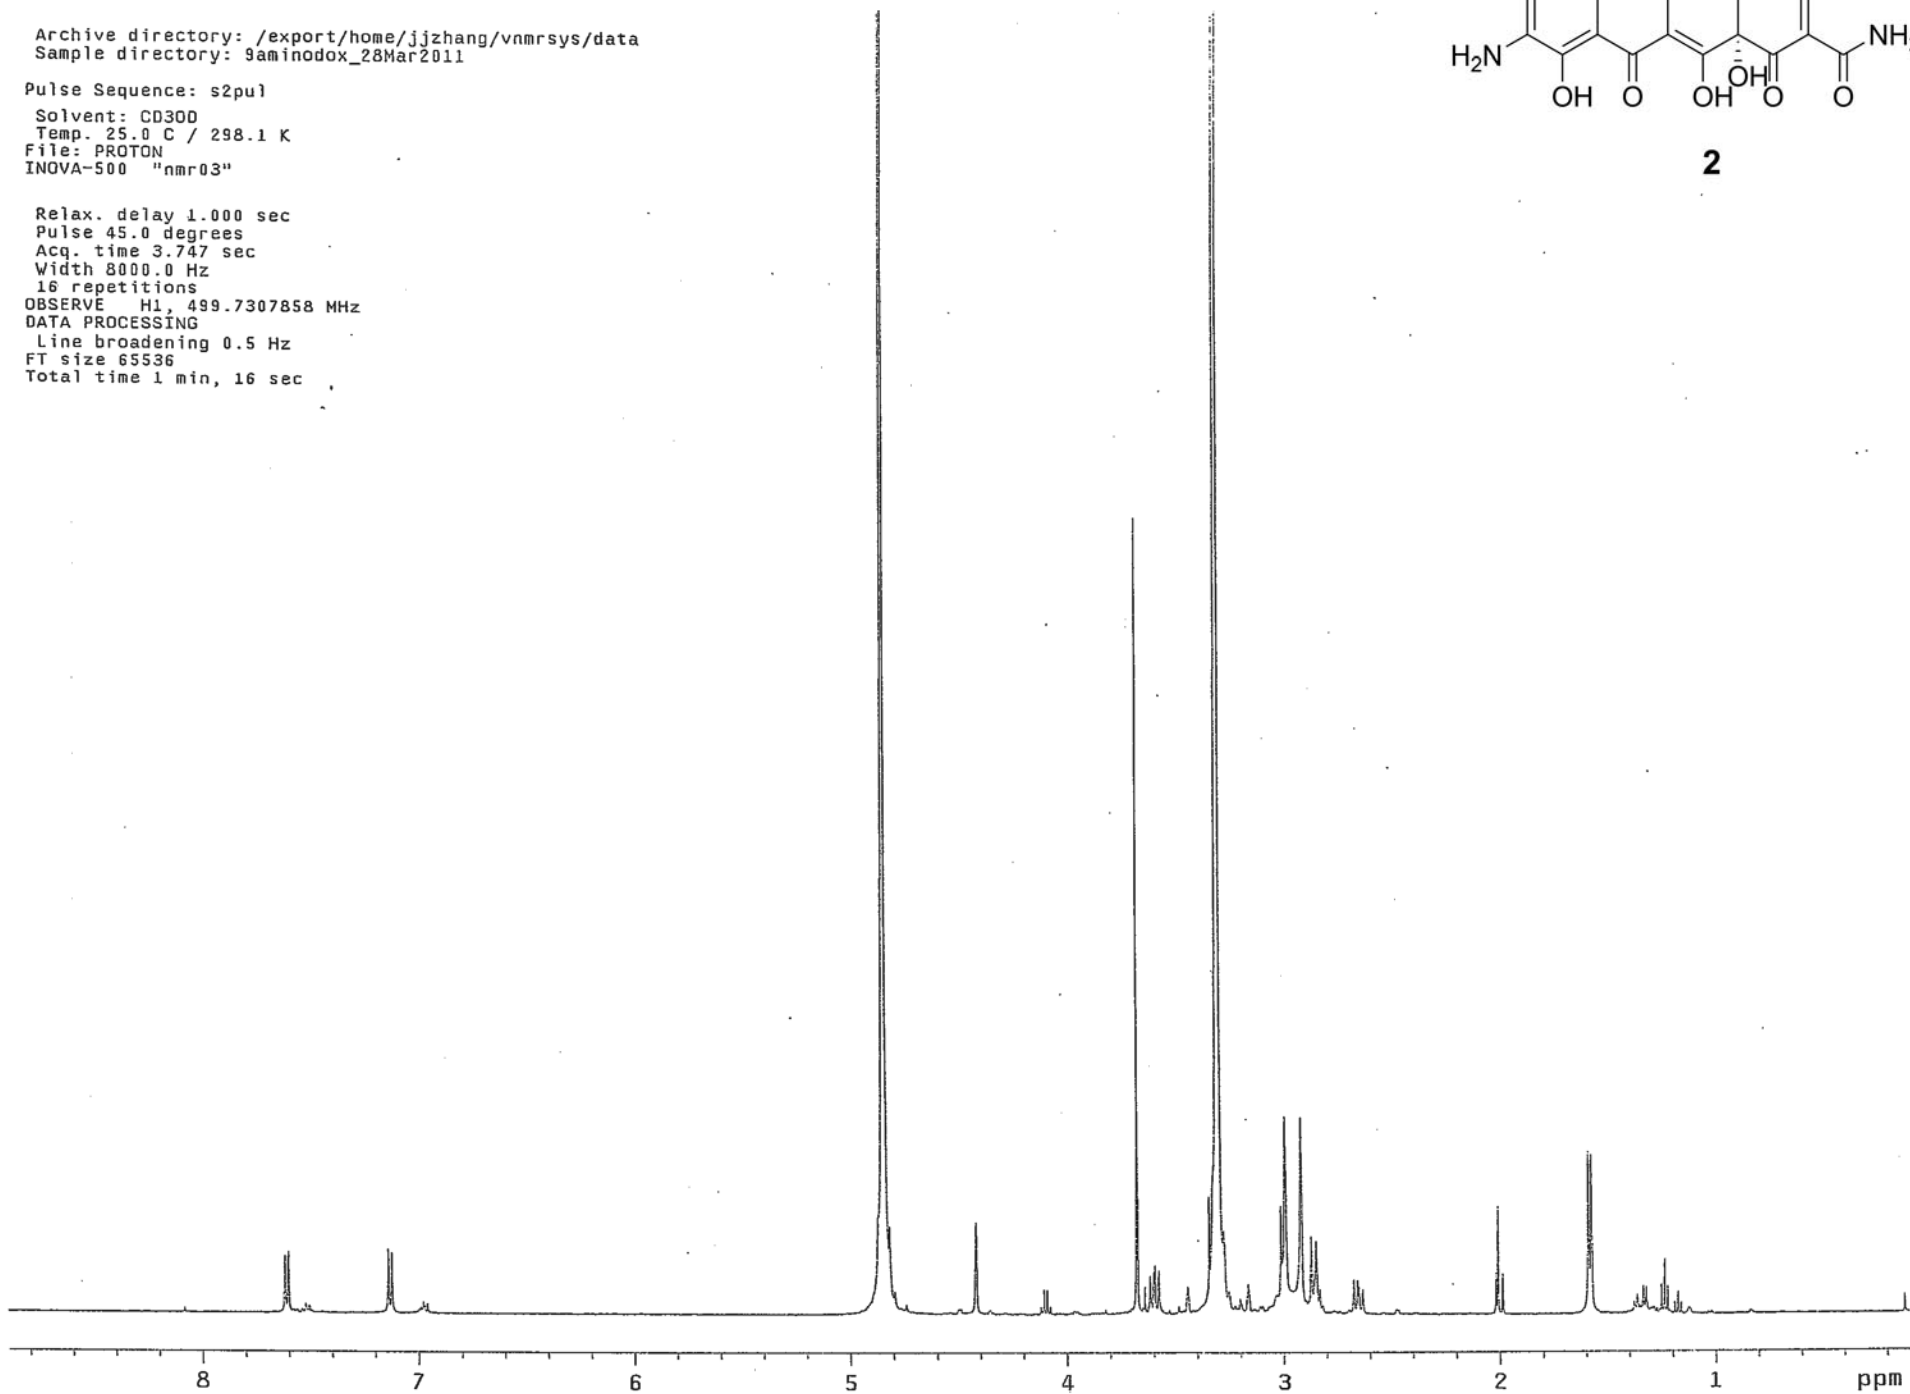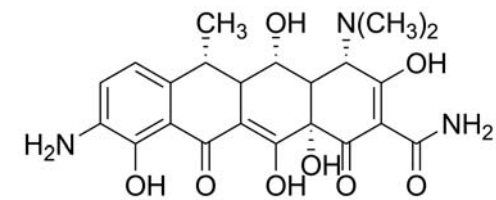

2

S11

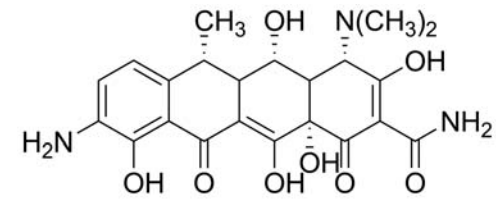

2

Archive directory: /export/1006/jjzhang/vnmrSYS/data  
 Sample directory: Saminodox\_28Mar2011

Pulse sequence: gCOSY  
 Solvent: CD300  
 Temp: 25.0 C / 298.1 K  
 File: gCOSY  
 INOVA-100 "nmr03"

Relax delay 1.000 sec  
 Acq. time 0.126 sec  
 Width 8000.0 Hz  
 2D Width 8000.0 Hz  
 Single scan  
 256 increments  
 OBSERVE F1: 499.7307858 MHz  
 DATA PROCESSING  
 Sq. sine bell 0.064 sec  
 F1 DATA PROCESSING  
 Sq. sine bell 0.016 sec  
 FT size: 4096 x 4096  
 Total time 5 min, 14 sec

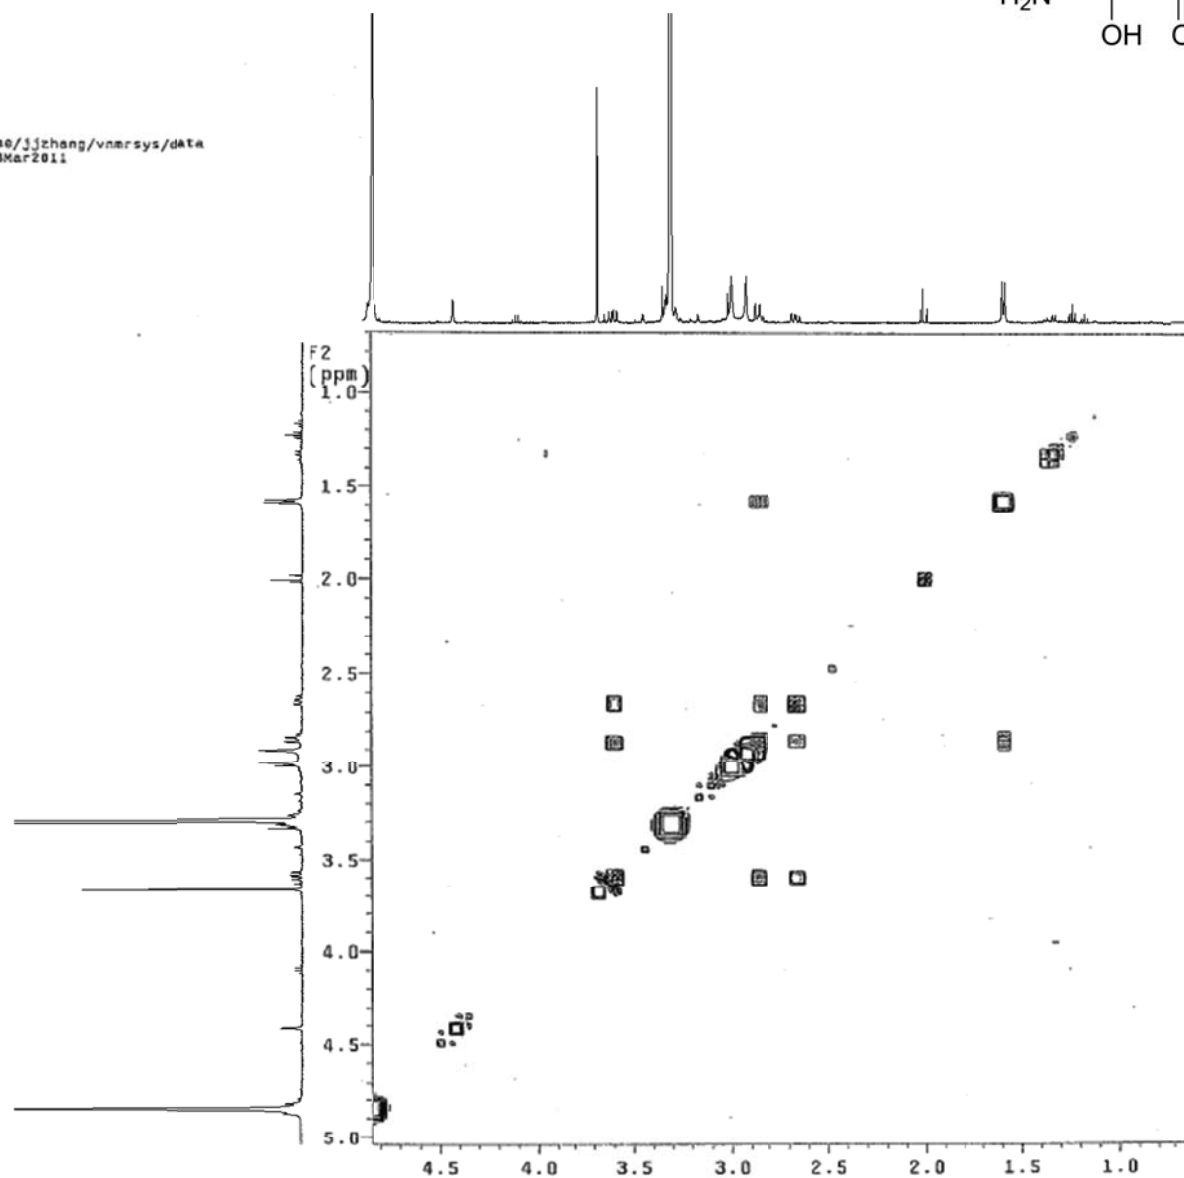

Archive directory: /export/home/jjzhang/vnmrsys/data  
Sample directory: jj-i-89No107\_11Jan2011  
File: CARBON

Pulse Sequence: s2pu1  
Solvent: DMSO  
Temp. 25.0 C / 298.1 K  
INNOVA-400 "ui400"

Relax. delay 1.000 sec  
Pulse 45.0 degrees  
Acq. time 1.197 sec  
Width 25157.2 Hz  
512 repetitions  
OBSERVE C13, 100.5268572 MHz  
DECOUPLE H1, 399.7904313 MHz  
Power 41 dB  
continuously on  
WALTZ-16 modulated  
DATA PROCESSING  
Line broadening 0.8 Hz  
FT size 65536  
Total time 18 min, 49 sec

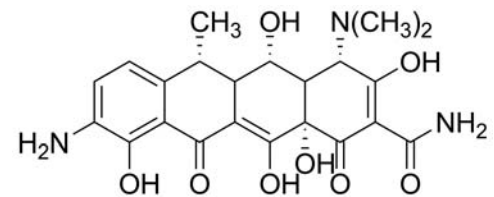

2

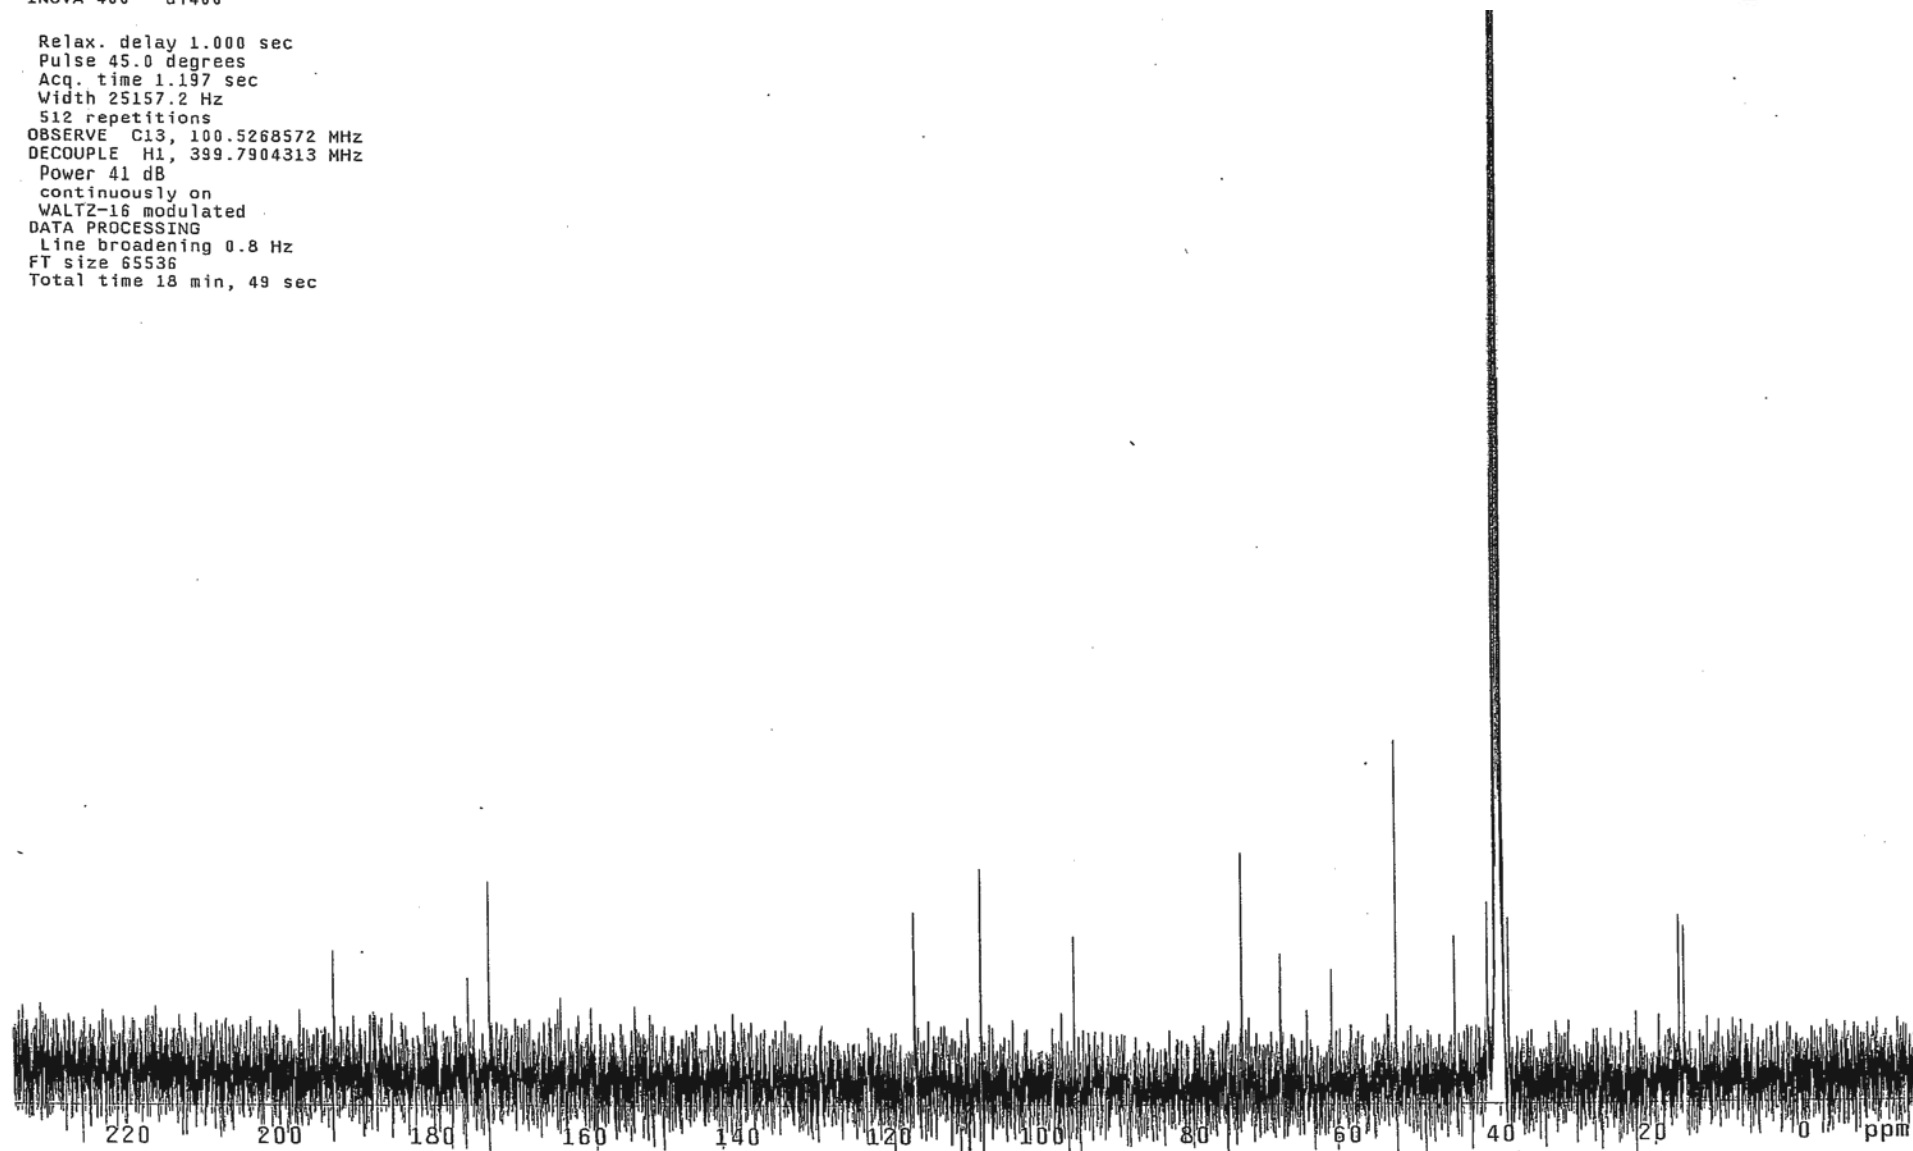





jj-iii-40No202\_10Jun2011

Archive directory: /export/home/jjzhang/vnmrsys/data  
Sample directory: jj-iii-40No202\_10Jun2011  
File: CARBON

Pulse Sequence: s2pul

Solvent: CD300  
Temp. 25.0 C / 298.1 K  
User: 1-14-87  
INOVA-500 "u1500"

Relax. delay 1.000 sec  
Pulse 45.0 degrees  
Acq. time 1.299 sec  
Width 31446.5 Hz  
2000 repetitions  
OBSERVE C13, 125.6573720 MHz  
DECOUPLE H1, 499.7332686 MHz  
Power 48 dB  
continuously on  
WALTZ-16 modulated  
DATA PROCESSING  
Line broadening 0.5 Hz  
FT size 131072  
Total time 1 hr, 17 min, 0 sec

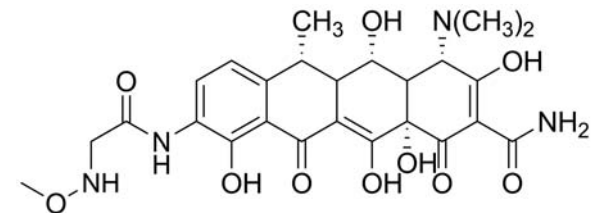

4

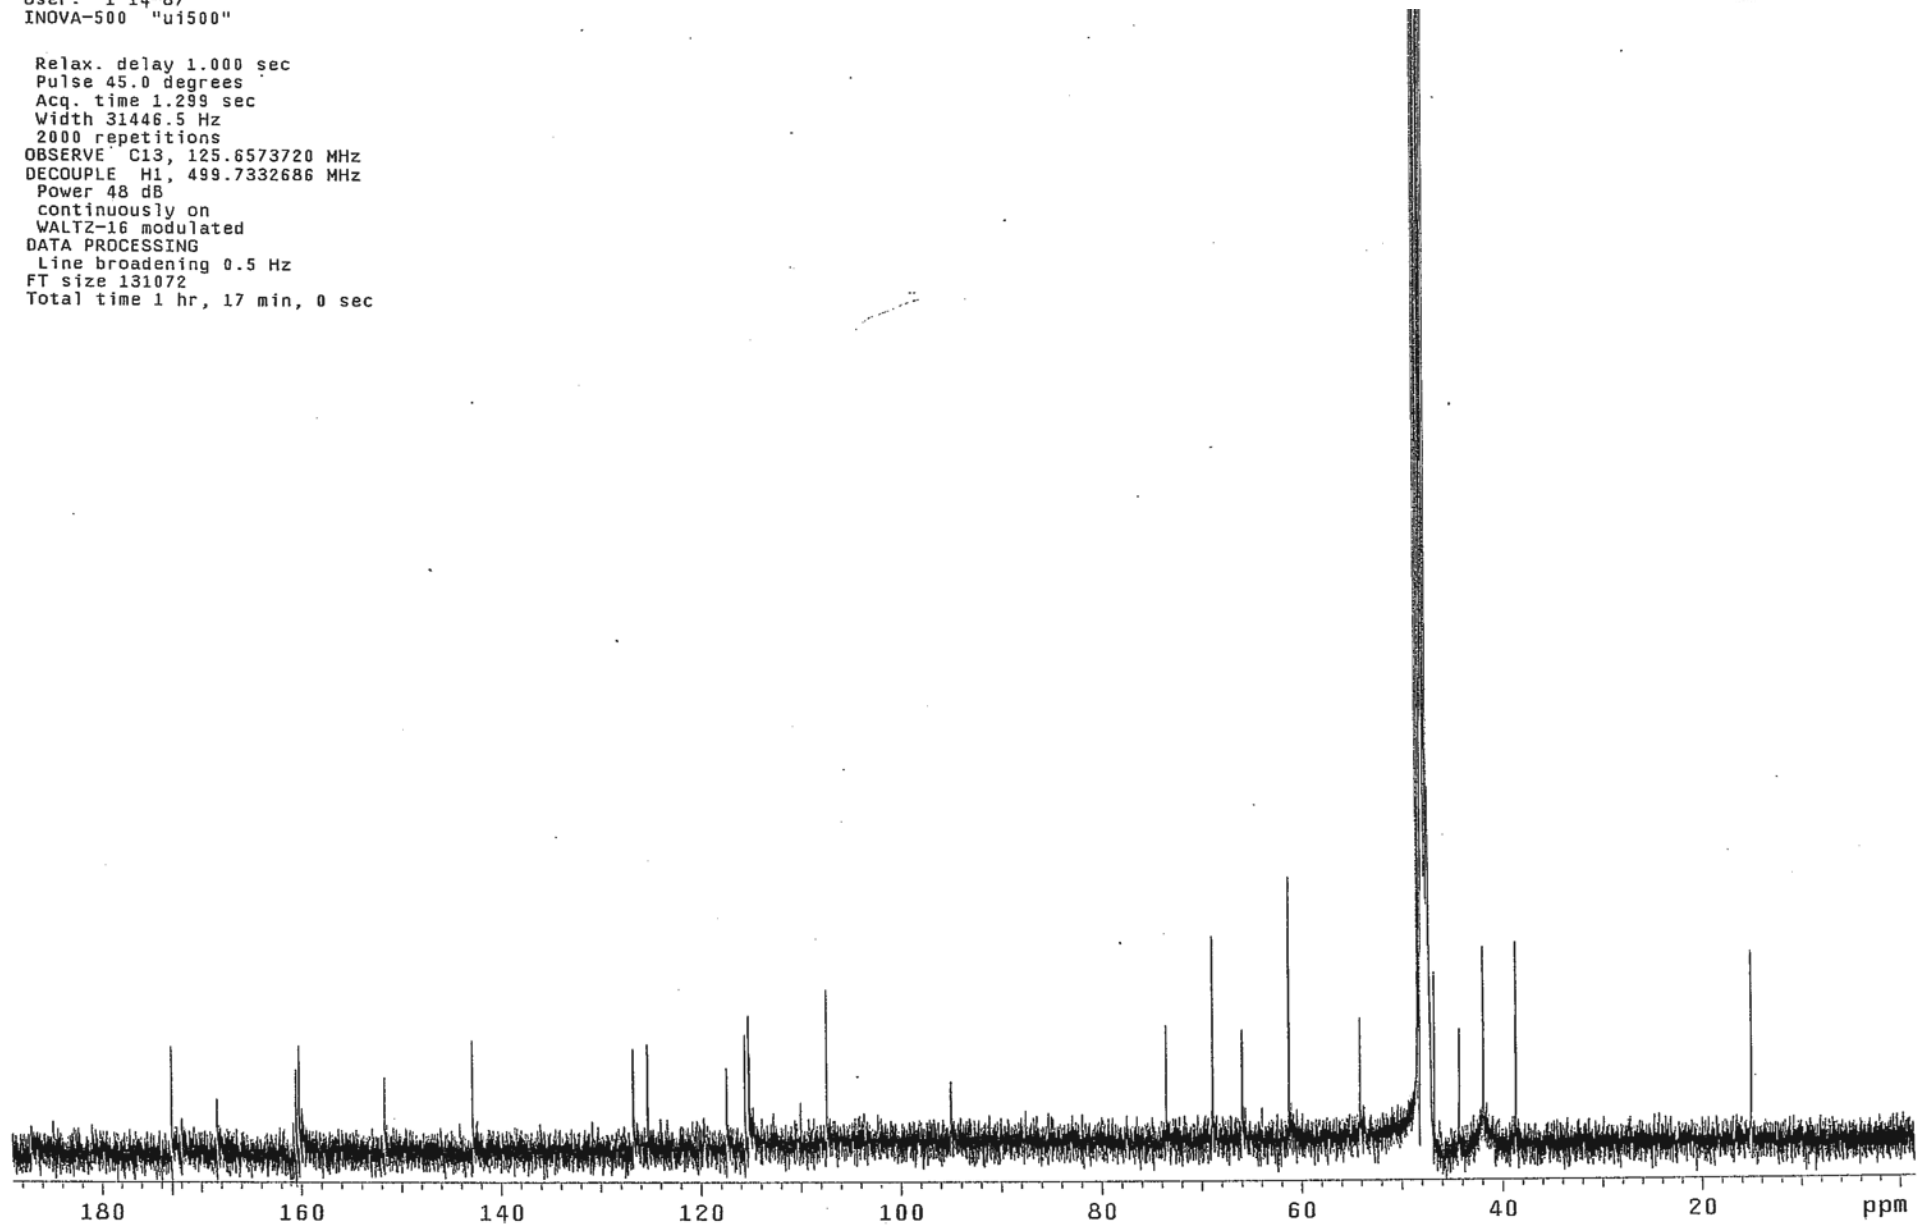





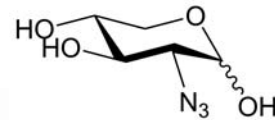

Archive directory: /export/home/jjzhang/vnmrsys/data  
Sample directory: jj-iii-124N276\_22Aug2011-14:24:54  
File: CARBON

Pulse Sequence: s2pu1  
Solvent: CD3OD  
Temp. 25.0 C / 298.1 K  
INOVA-400 "ui400"

Relax. delay 1.000 sec  
Pulse 45.0 degrees  
Acq. time 1.197 sec  
Width 25157.2 Hz  
112 repetitions  
OBSERVE C13, 100.5267758 MHz  
DECOUPLE H1, 399.7901075 MHz  
Power 41 dB  
continuously on  
WALTZ-16 modulated  
DATA PROCESSING  
Line broadening 0.8 Hz  
FT size 65536  
Total time 18 min, 49 sec

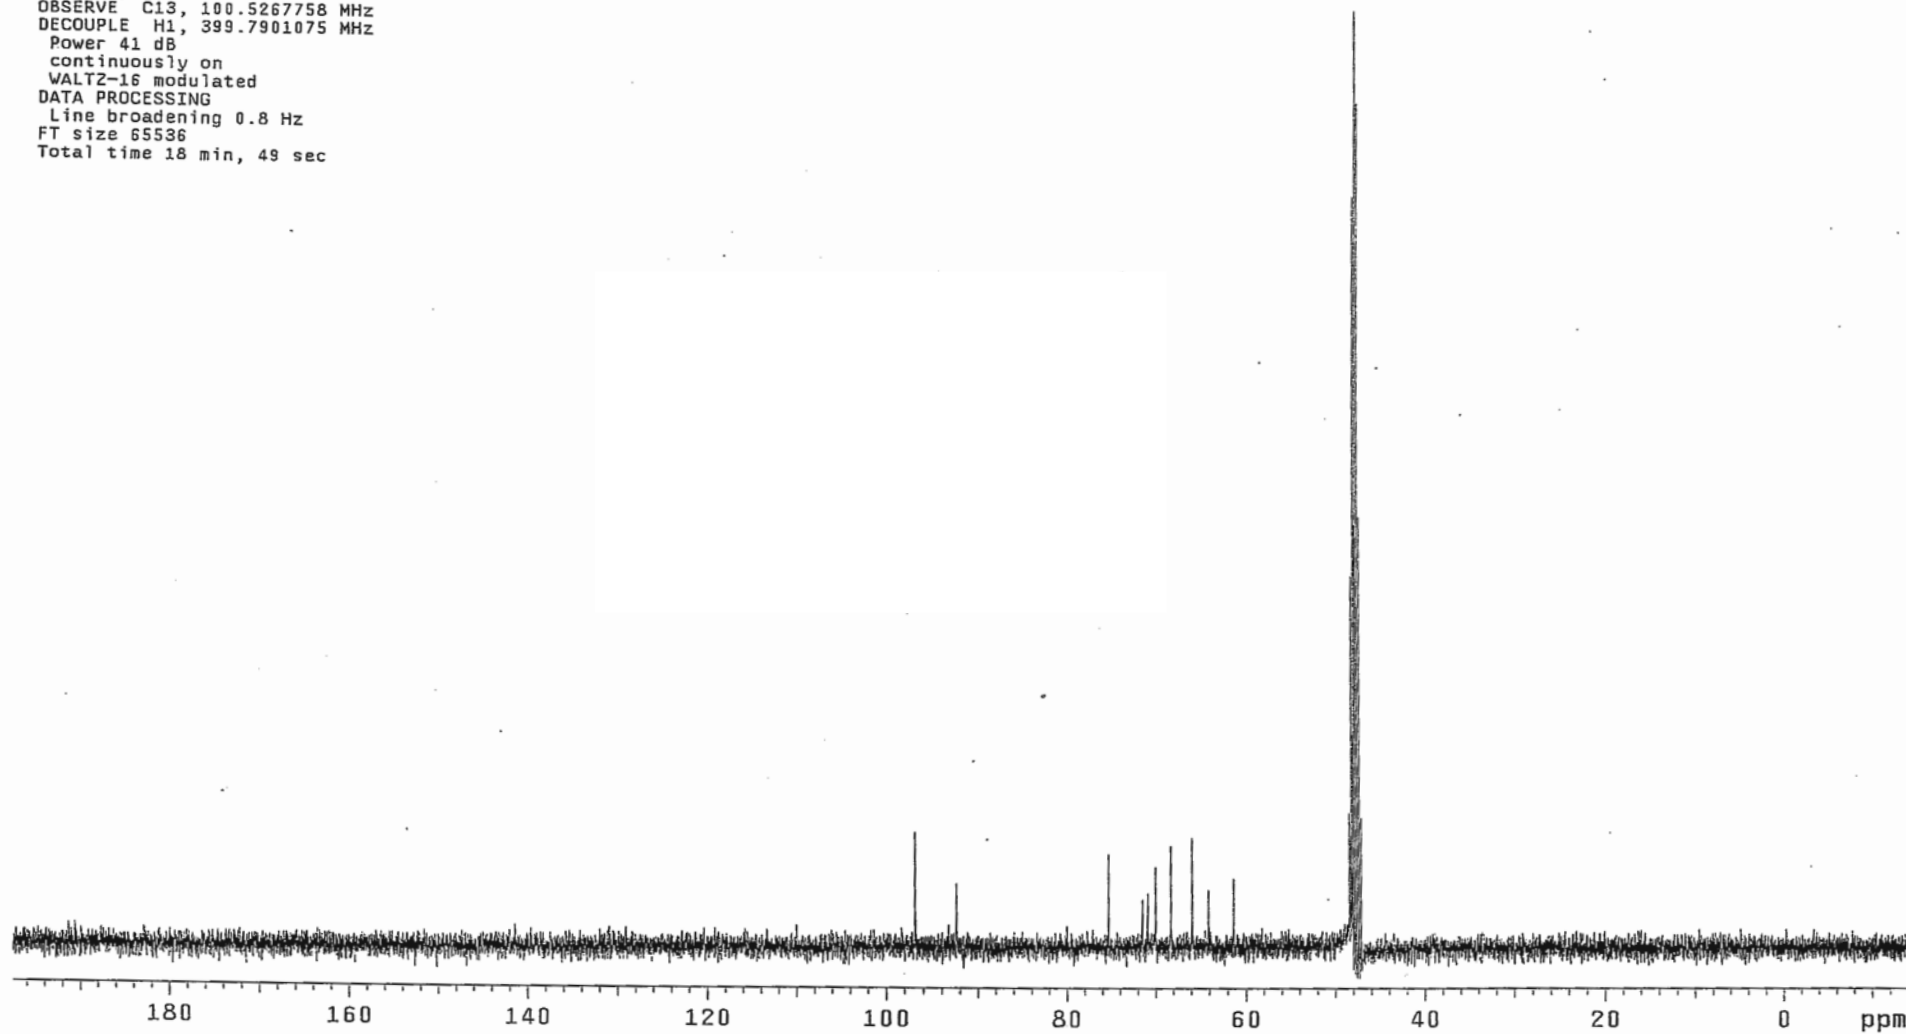

Archive directory: /export/home/jjzhang/vnmrsys/data  
Sample directory: jj-iii-123N275\_19Aug2011  
File: PROTON

Pulse Sequence: s2pul

Solvent: CD3OD  
Temp. 25.0 C / 298.1 K  
INOVA-500 "ui500"

Relax. delay 1.000 sec  
Pulse 45.0 degrees  
Acq. time 3.747 sec  
Width 8000.0 Hz  
8 repetitions  
OBSERVE H1, 499.7307855 MHz  
DATA PROCESSING  
Line broadening 0.5 Hz  
FT size 65536  
Total time 0 min, 38 sec

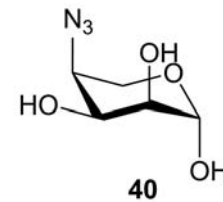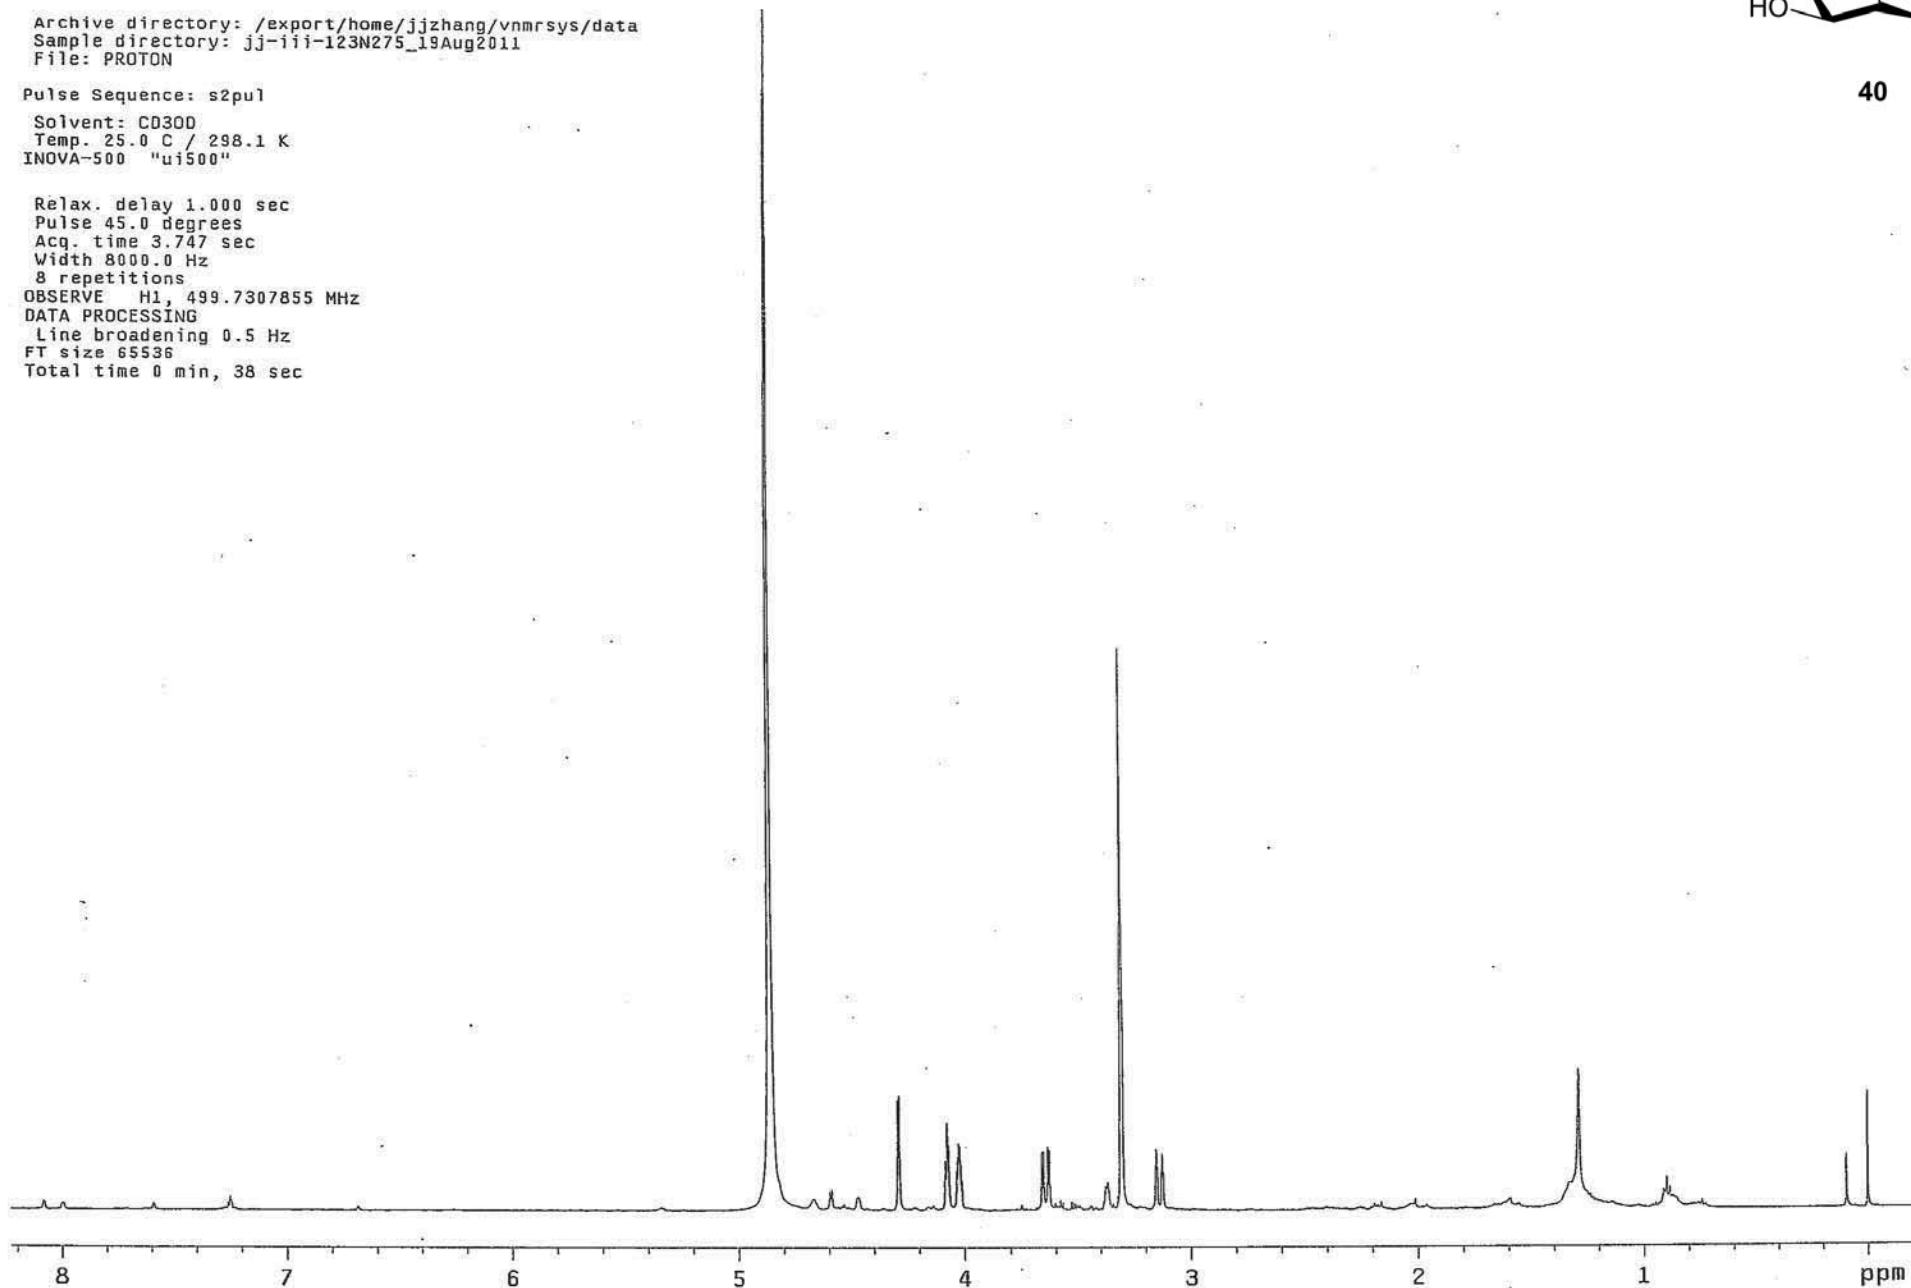

jj-iii-123N275C13\_19Aug2011

Archive directory: /export/home/jjzhang/vnmrsys/data  
Sample directory: jj-iii-123N275C13\_19Aug2011

Pulse Sequence: s2pu1  
Solvent: CD3OD  
Temp. 25.0 C / 298.1 K  
User: 1-14-87  
File: CARBON  
INNOVA-500 "nmr03"

Relax. delay 1.000 sec  
Pulse 45.0 degrees  
Acq. time 1.299 sec  
Width 31446.5 Hz  
2000 repetitions  
OBSERVE C13, 125.6573720 MHz  
DECOUPLE H1, 499.7332686 MHz  
Power 48 dB  
continuously on  
WALTZ-16 modulated  
DATA PROCESSING  
Line broadening 0.5 Hz  
FT size 131072  
Total time 1 hr, 17 min, 0 sec

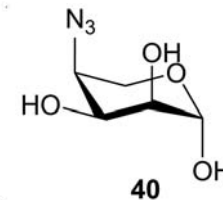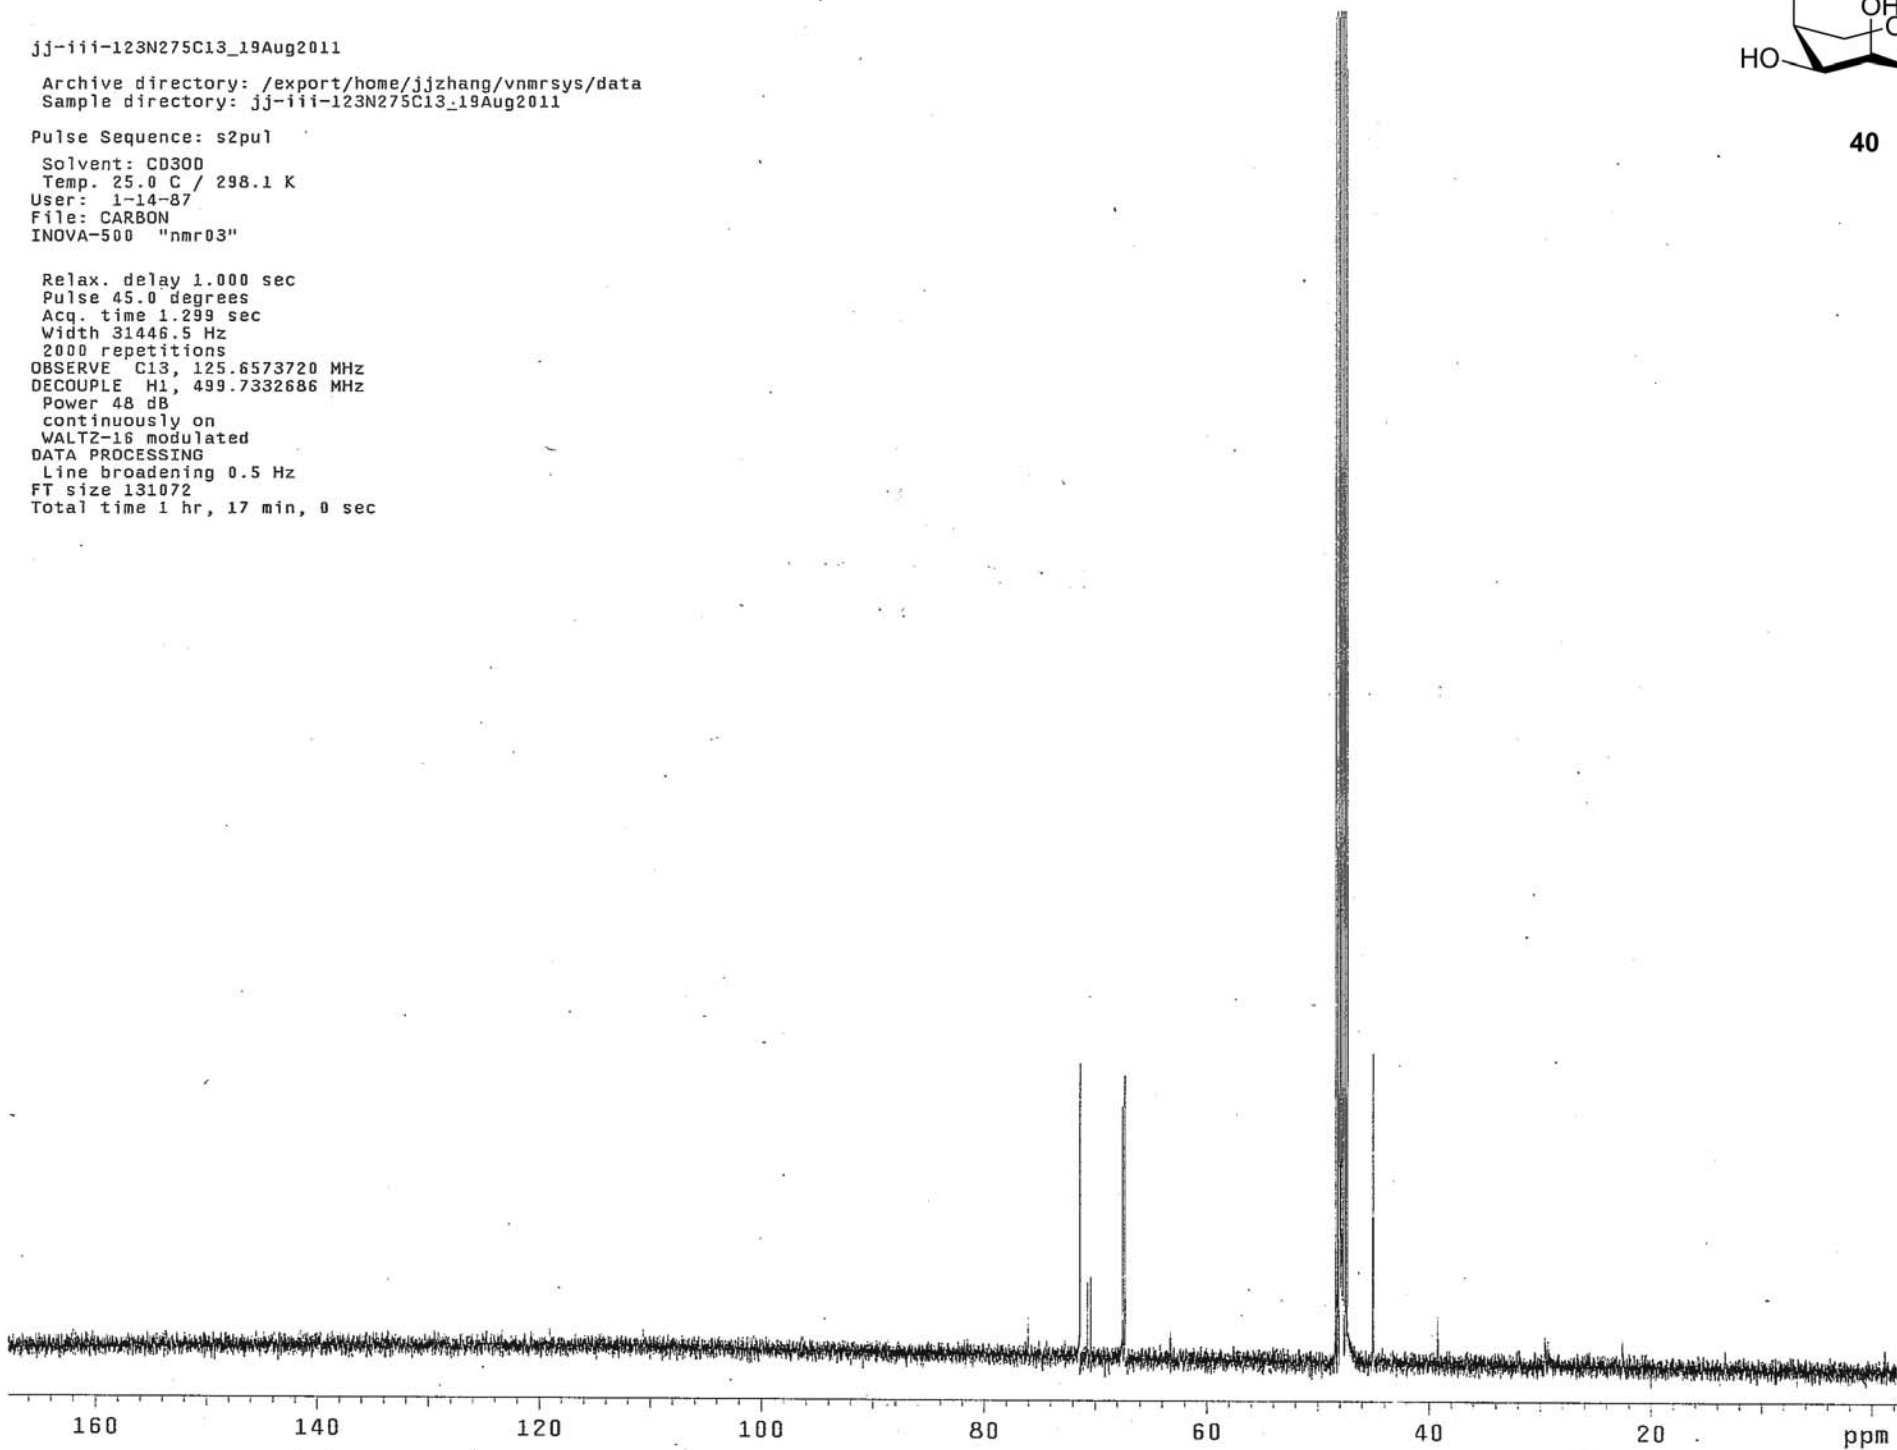

S20

Archive directory: /export/home/jjzhang/vnmrsys/data  
Sample directory: jj-iii-86N241\_26Jul2011

Pulse Sequence: s2pu1  
Solvent: CDC13  
Temp. 25.0 C / 298.1 K  
File: PROTON  
INOVA-400 "ui400"

Relax. delay 1.000 sec  
Pulse 45.0 degrees  
Acq. time 3.754 sec  
Width 6387.7 Hz  
8 repetitions  
OBSERVE H1, 399.7865157 MHz  
DATA PROCESSING  
FT size 65536  
Total time 0 min, 57 sec

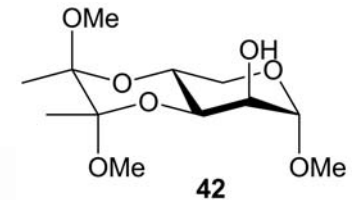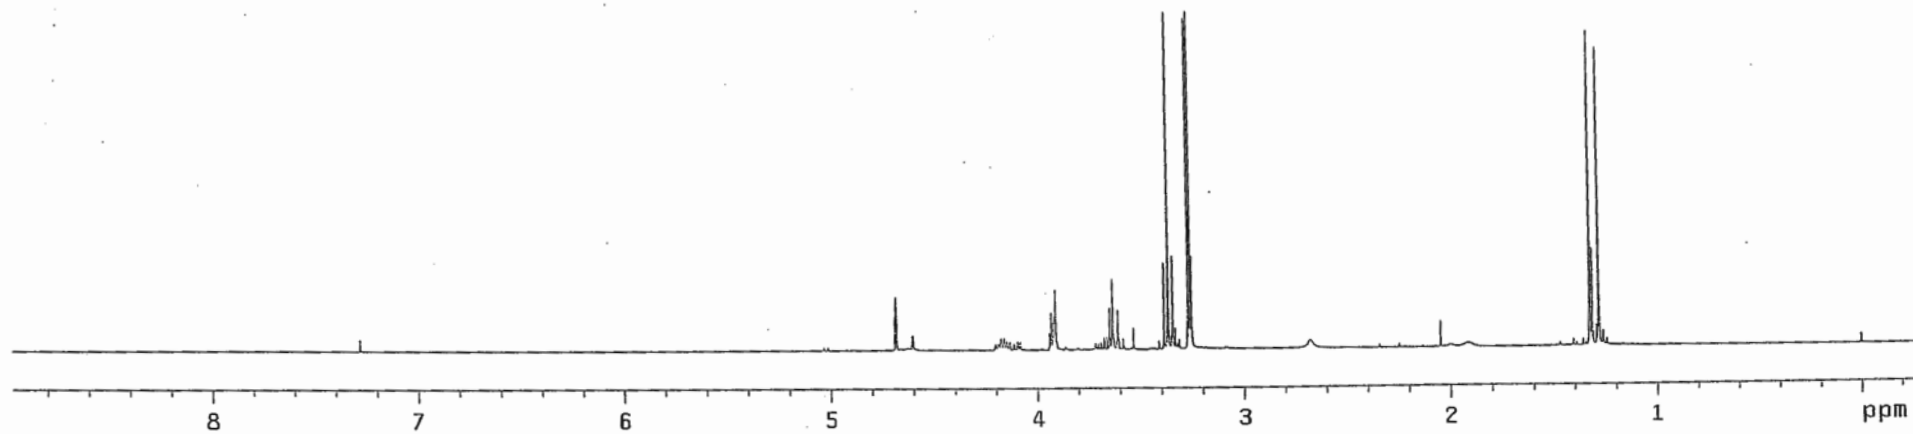

Jj-iii-86N241C13\_26Jul2011

Archive directory: /export/home/jjzhang/vnmrsys/data  
Sample directory: jj-iii-86N241C13\_26Jul2011  
File: CARBON

Pulse Sequence: s2pu1  
Solvent: CDCl3  
Temp. 25.0 C / 298.1 K  
INOVA-400 "ui400"

Relax. delay 1.000 sec  
Pulse 45.0 degrees  
Acq. time 1.197 sec  
Width 25157.2 Hz  
512 repetitions  
OBSERVE C13, 100.5263777 MHz  
DECOUPLE H1, 399.7885243 MHz  
Power 41 dB  
continuously on  
WALTZ-16 modulated  
DATA PROCESSING  
Line broadening 0.8 Hz  
FT size 65536  
Total time 18 min, 49 sec

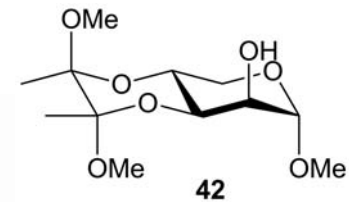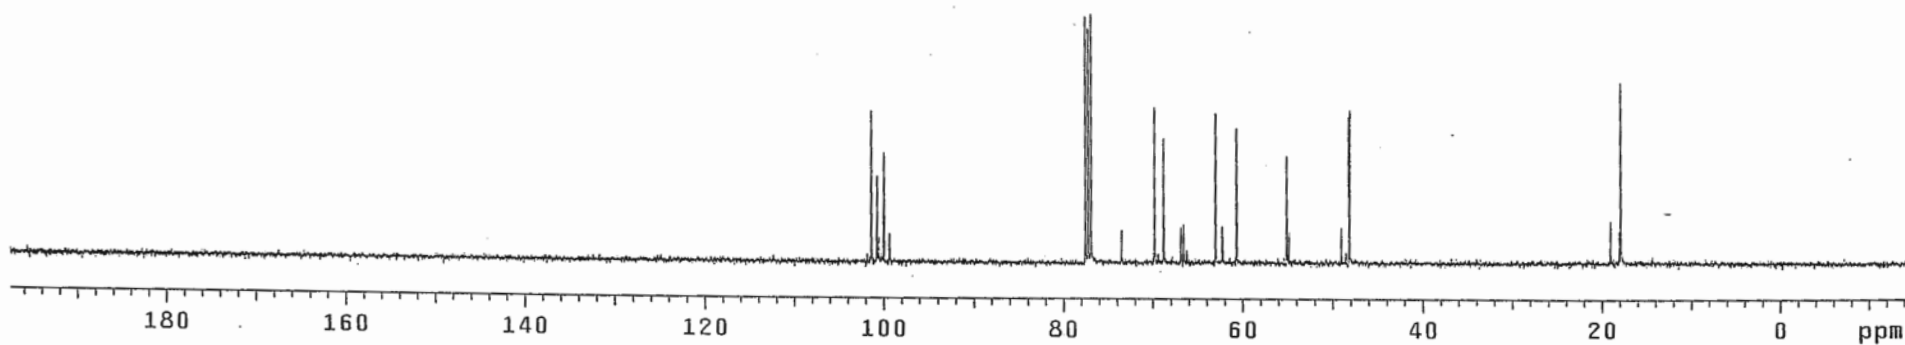

Archive directory: /export/home/jjzhang/vnmrsys/data  
Sample directory: jj-iii-93N243-A\_29Jul2011  
File: PROTON

Pulse Sequence: s2pu1

Solvent: CDCl3  
Temp. 25.0 C / 298.1 K  
INOVA-500 "ui500"

Relax. delay 1.000 sec  
Pulse 45.0 degrees  
Acq. time 3.747 sec  
Width 8000.0 Hz  
8 repetitions  
OBSERVE H1, 499.7288114 MHz  
DATA PROCESSING  
Line broadening 0.5 Hz  
FT size 65536  
Total time 0 min, 38 sec

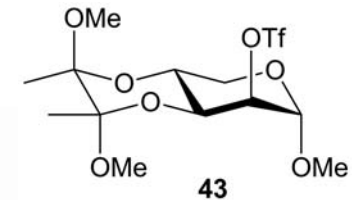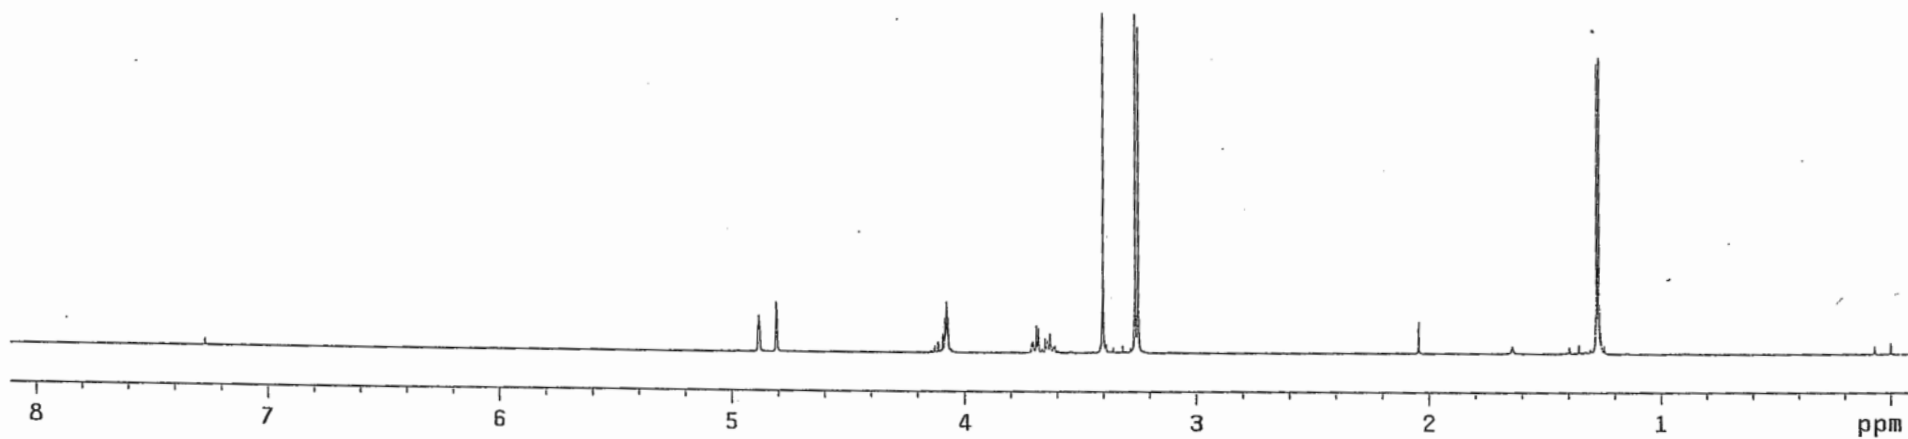

S23

Archive directory: /export/home/jjzhang/vnmrsys/data  
Sample directory: jj-iii-93N243\_29Jul2011  
File: CARBON

Pulse Sequence: s2pu1

Solvent: CDC13  
Temp. 25.0 C / 298.1 K  
User: 1-14-87  
INOVA-500 "ui500"

Relax. delay 1.000 sec  
Pulse 45.0 degrees  
Acq. time 1.299 sec  
Width 31446.5 Hz  
128 repetitions  
OBSERVE C13, 125.6568744 MHz  
DECOUPLE H1, 499.7312897 MHz  
Power 48 dB  
continuously on  
WALTZ-16 modulated  
DATA PROCESSING  
Line broadening 0.5 Hz  
FT size 131072  
Total time 19 min, 46 sec

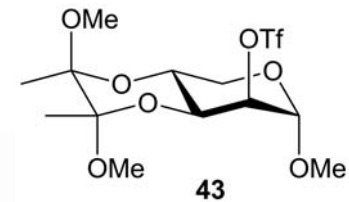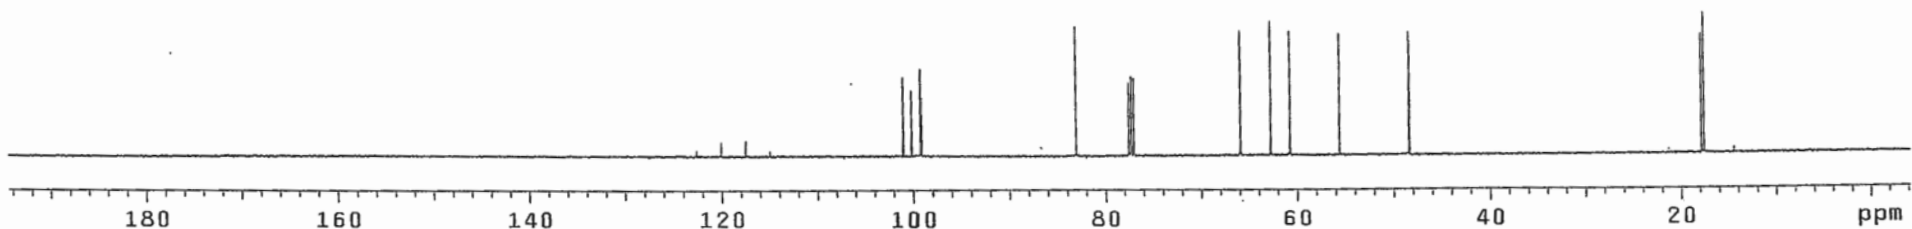

S24



Archive directory: /export/home/jjzhang/vnmrsys/data  
Sample directory: jj-iii-112N259-A\_11Aug2011  
File: PROTON

Pulse Sequence: s2pu1  
Solvent: CDCl3  
Temp. 25.0 C / 298.1 K  
INOVA-500 "ui500"

Relax. delay 1.000 sec  
Pulse 45.0 degrees  
Acq. time 3.747 sec  
Width 8000.0 Hz  
16 repetitions  
OBSERVE H1, 499.7288143 MHz  
DATA PROCESSING  
Line broadening 0.5 Hz  
FT size 65536  
Total time 1 min, 16 sec

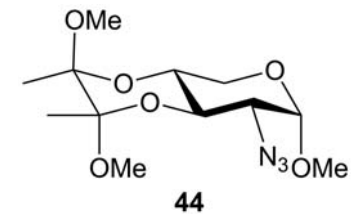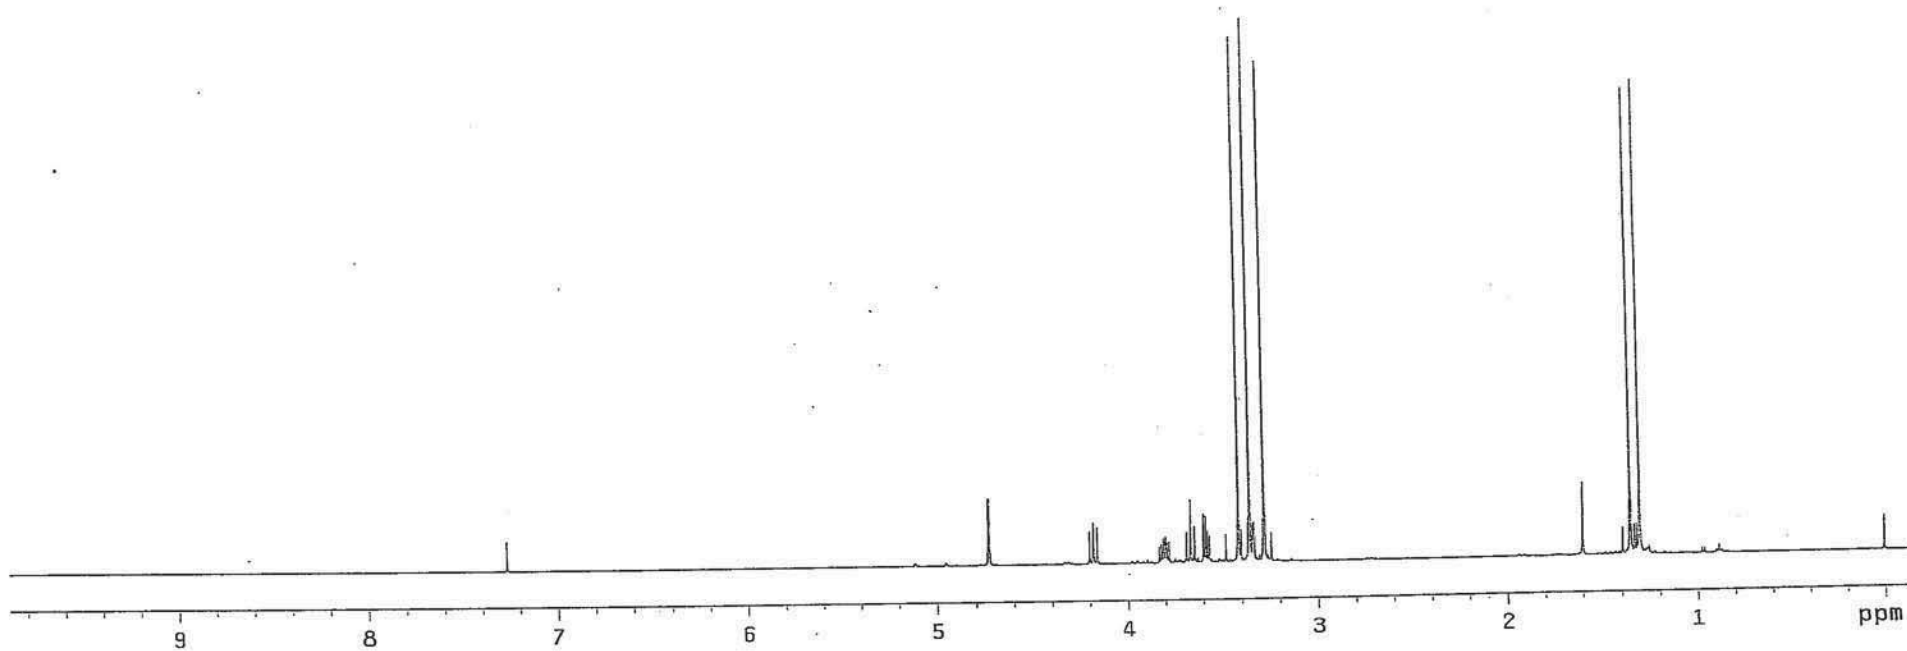

Archive directory: /export/home/jjzhang/vnmrsys/data  
Sample directory: jj-iii-114N263-12\_15Aug2011

Pulse Sequence: gCOSY  
Solvent: CDCl3  
Temp. 25.0 C / 298.1 K  
File: gCOSY  
INOVA-400 "ui400"

Relax. delay 1.000 sec  
Acq. time 0.160 sec  
Width 6387.7 Hz  
2D Width 6387.7 Hz  
Single scan  
128 increments  
OBSERVE H1, 399.7865360 MHz  
DATA PROCESSING  
Sq. sine bell 0.080 sec  
F1 DATA PROCESSING  
Sq. sine bell 0.020 sec  
FT size 4096 x 4096  
Total time 2 min, 50 sec

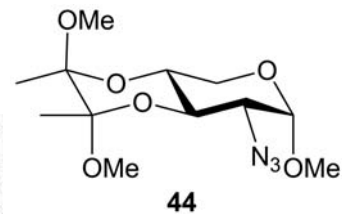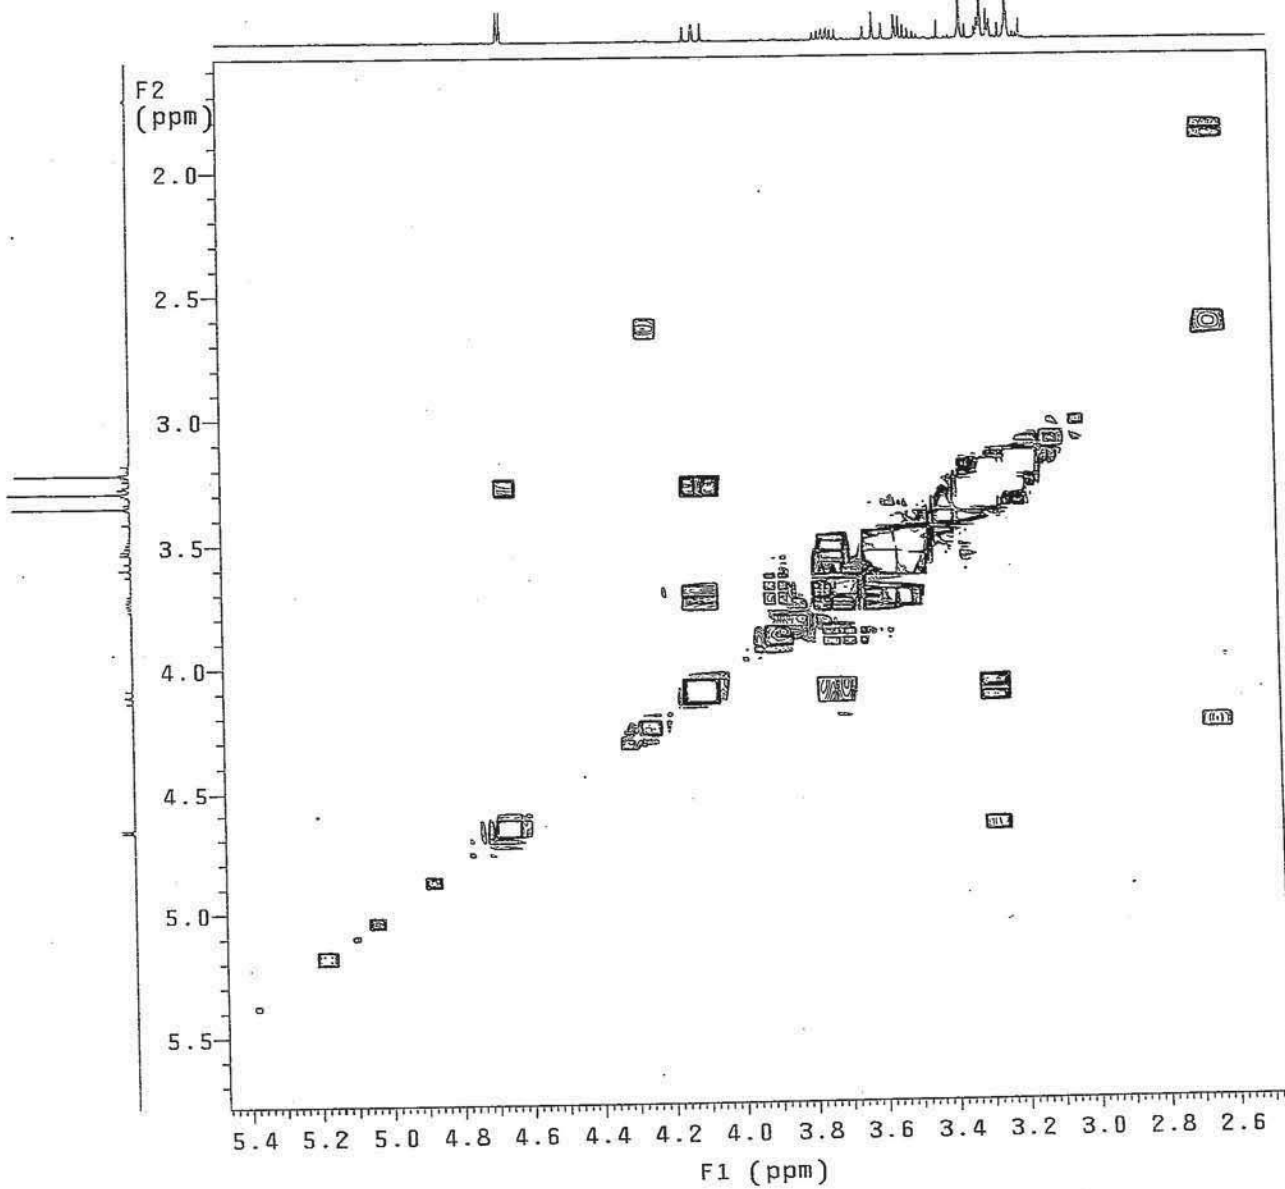

Archive directory: /export/home/jjzhang/vnmrsys/data  
Sample directory: jj-iii-114N263-12\_15Aug2011  
File: CARBON

Pulse Sequence: s2pul

Solvent: CDCl3  
Temp. 25.0 C / 298.1 K  
INOVA-400 "ui400"

Relax. delay 1.000 sec  
Pulse 45.0 degrees  
Acq. time 1.197 sec  
Width 25157.2 Hz  
160 repetitions  
OBSERVE C13, 100.5263777 MHz  
DECOUPLE H1, 399.7885243 MHz  
Power 41 dB  
continuously on  
WALTZ-16 modulated  
DATA PROCESSING  
Line broadening 0.8 Hz  
FT size 65536  
Total time 18 min, 49 sec

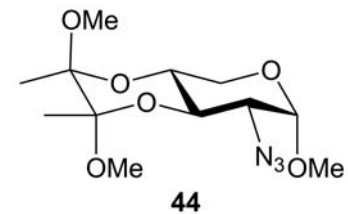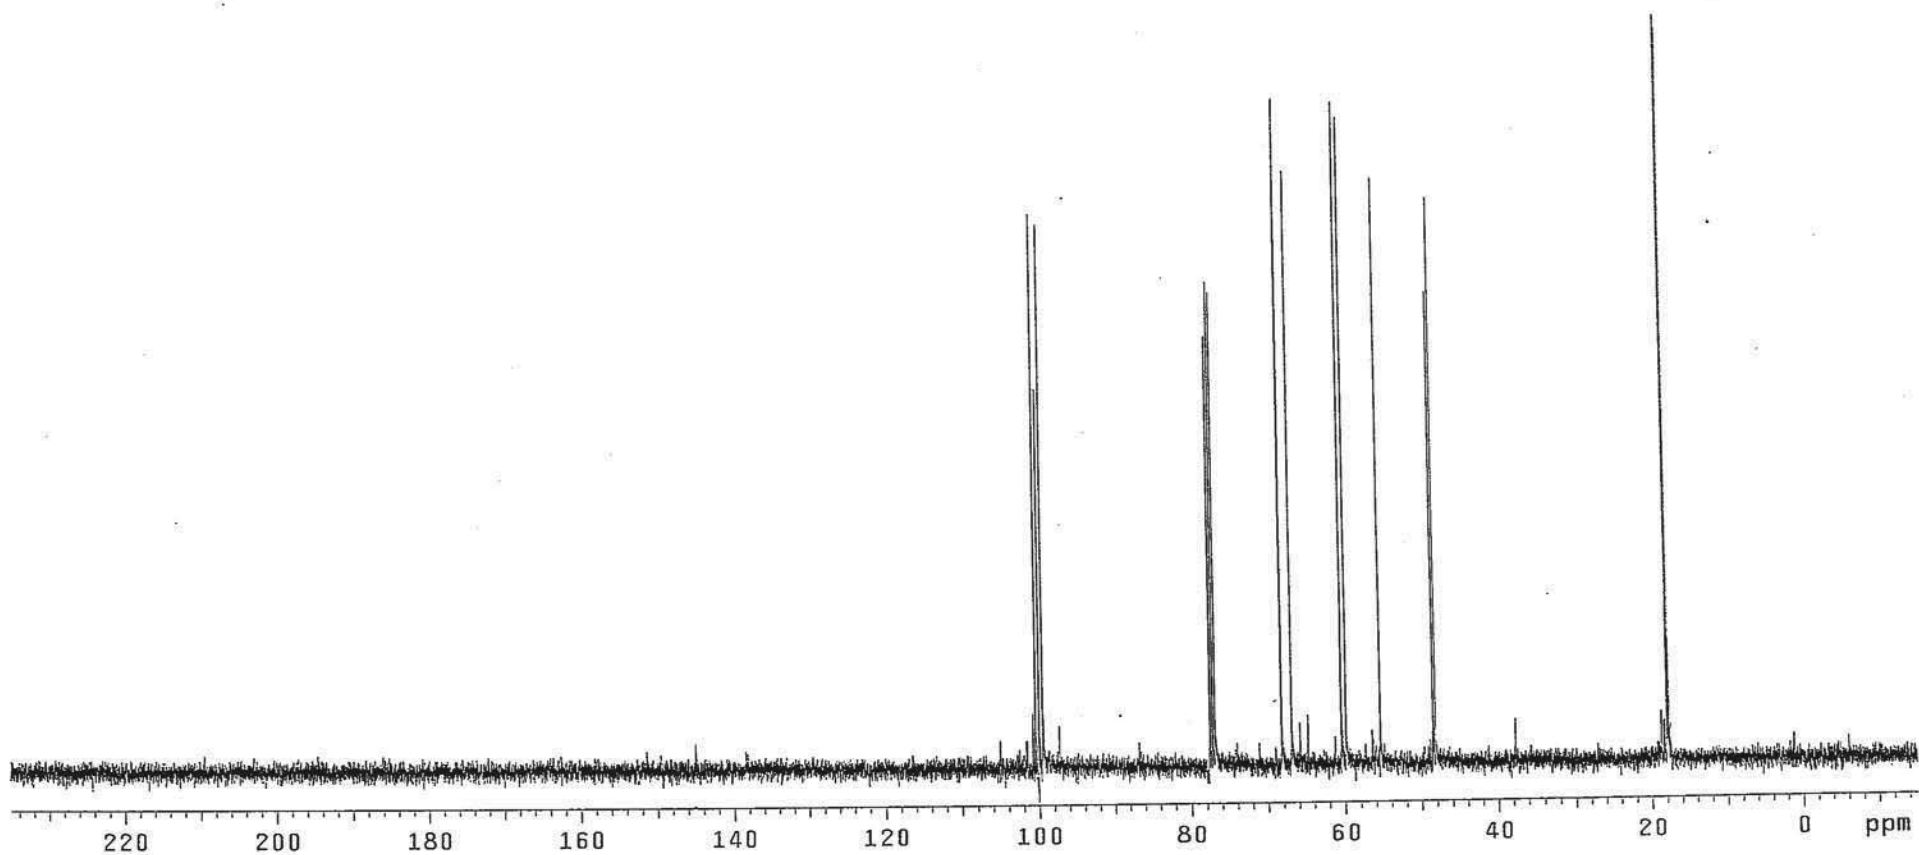

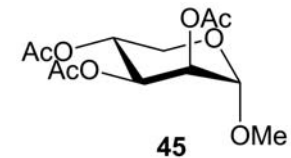

Archive directory: /export/home/jjzhang/vnmrsys/data  
 Sample directory: jj-iii-55N215-61\_28Jun2011

Pulse Sequence: s2pu1  
 Solvent: CDC13  
 Temp. 25.0 C / 298.1 K  
 File: PROTON  
 INOVA-500 "nmr03"

Relax. delay 1.000 sec  
 Pulse 45.0 degrees  
 Acq. time 3.754 sec  
 Width 6387.7 Hz  
 8 repetitions  
 OBSERVE H1, 399.7865251 MHz  
 DATA PROCESSING  
 FT size 65536  
 Total time 0 min, 57 sec

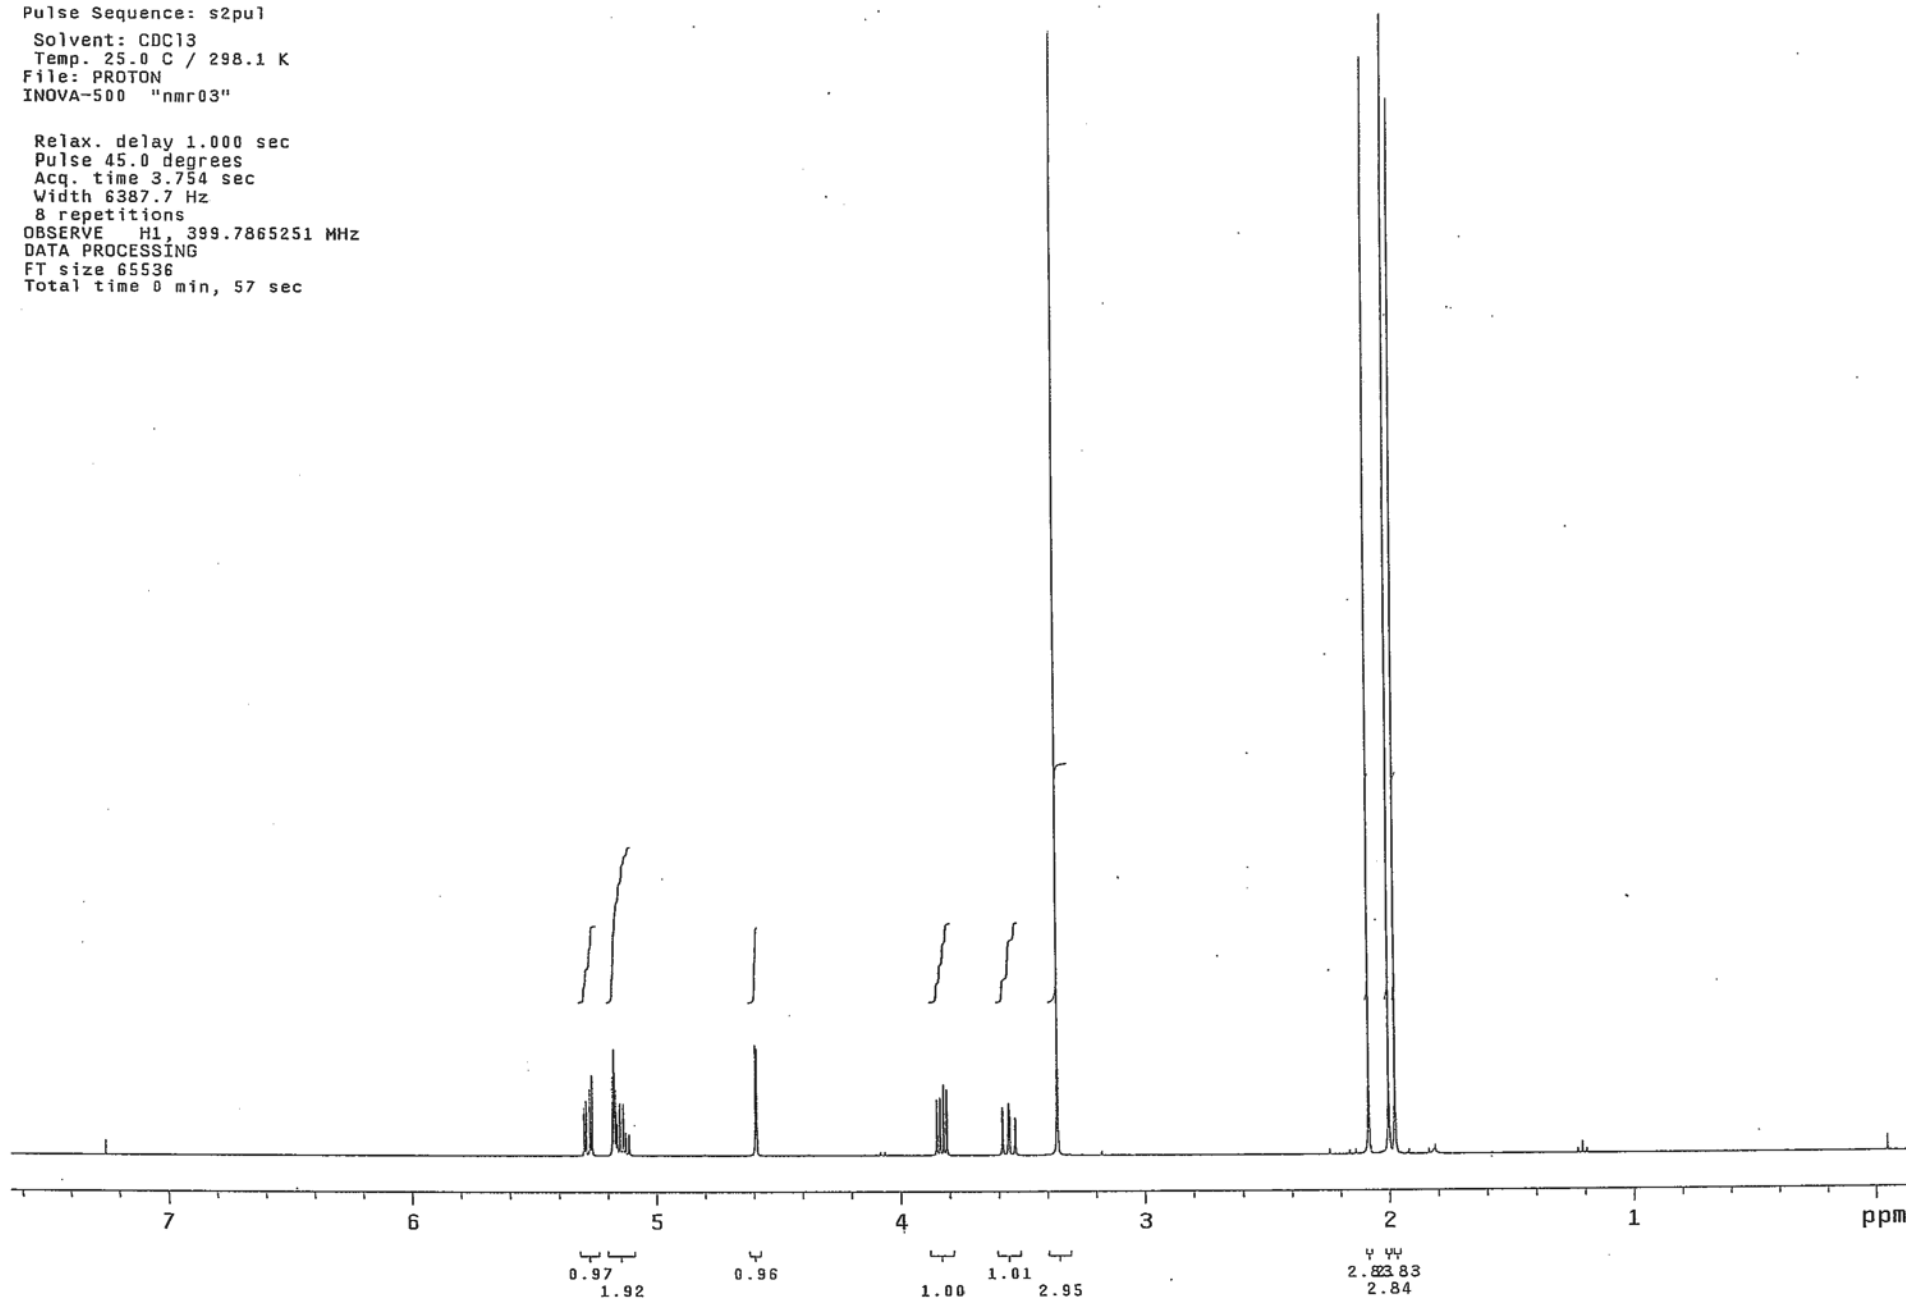

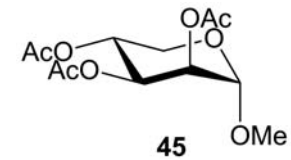

Archive directory: /export/home/jjzhang/vnmrSYS/data  
Sample directory: jj-iii-55N217C13\_03Jan2012  
File: CARBON

Pulse Sequence: s2pul  
Solvent: CDCl3  
Temp. 25.0 C / 298.1 K  
INOVA-400 "u1400"

Relax. delay 1.000 sec  
Pulse 45.0 degrees  
Acq. time 1.197 sec  
Width 25157.2 Hz  
208 repetitions  
OBSERVE C13, 100.5263777 MHz  
DECOUPLE H1, 399.7885243 MHz  
Power 41 dB  
continuously on  
WALTZ-16 modulated  
DATA PROCESSING  
Line broadening 0.8 Hz  
FT size 65536  
Total time 18 min, 49 sec

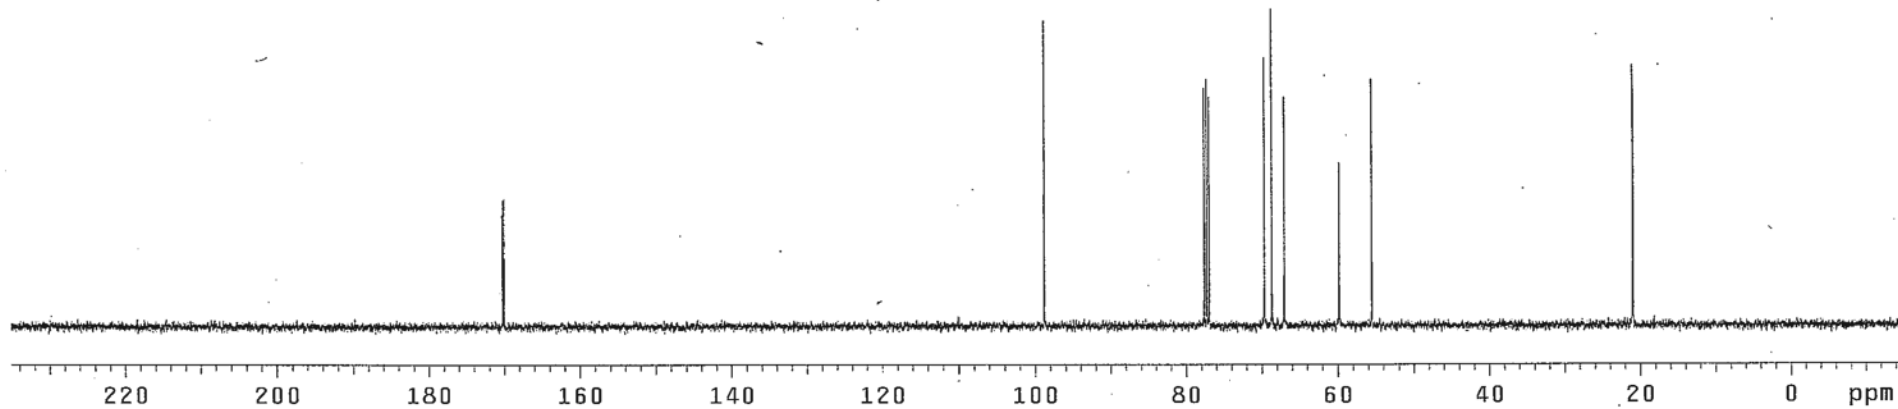

Archive directory: /export/home/jjzhang/vnmrsys/data  
Sample directory: jj-iii-82N239\_20Jul2011  
File: PROTON

Pulse Sequence: s2pul  
Solvent: CDC13  
Temp. 25.0 C / 298.1 K  
INNOVA-500 "ui500"

Relax. delay 1.000 sec  
Pulse 45.0 degrees  
Acq. time 3.747 sec  
Width 8000.0 Hz  
8 repetitions  
OBSERVE H1, 499.7288082 MHz  
DATA PROCESSING  
Line broadening 0.5 Hz  
FT size 65536  
Total time 0 min, 38 sec

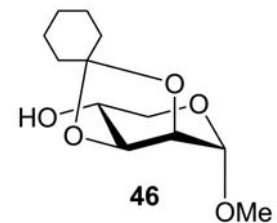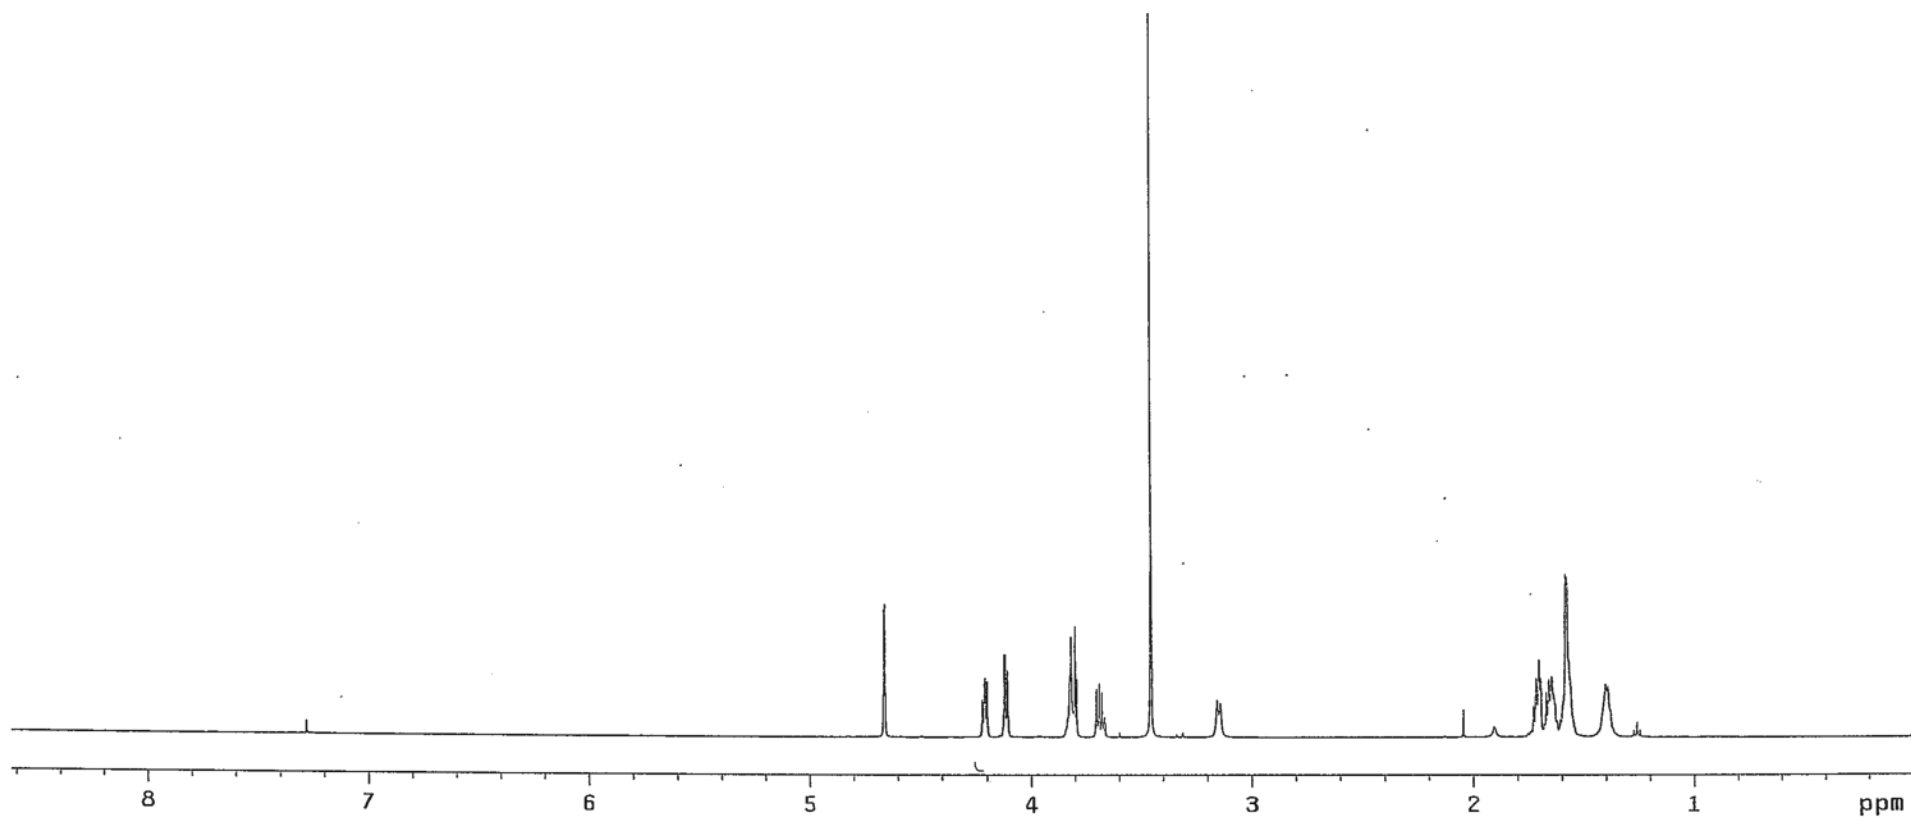

S30

Archive directory: /export/home/jjzhang/vnmrsys/data  
Sample directory: jj-iii-69N228\_10Jul2011-20:30:18  
File: CARBON

Pulse Sequence: s2pu1  
Solvent: CDC13  
Temp. 25.0 C / 298.1 K  
User: 1-14-87  
INOVA-500 "u1500"

Relax. delay 1.000 sec  
Pulse 45.0 degrees  
Acq. time 1.299 sec  
Width 31446.5 Hz  
512 repetitions  
OBSERVE C13, 125.6568744 MHz  
DECOUPLE H1, 499.7312897 MHz  
Power 48 dB  
continuously on  
WALTZ-16 modulated  
DATA PROCESSING  
Line broadening 0.5 Hz  
FT size 131072  
Total time 19 min, 46 sec

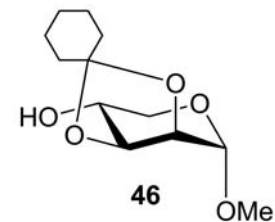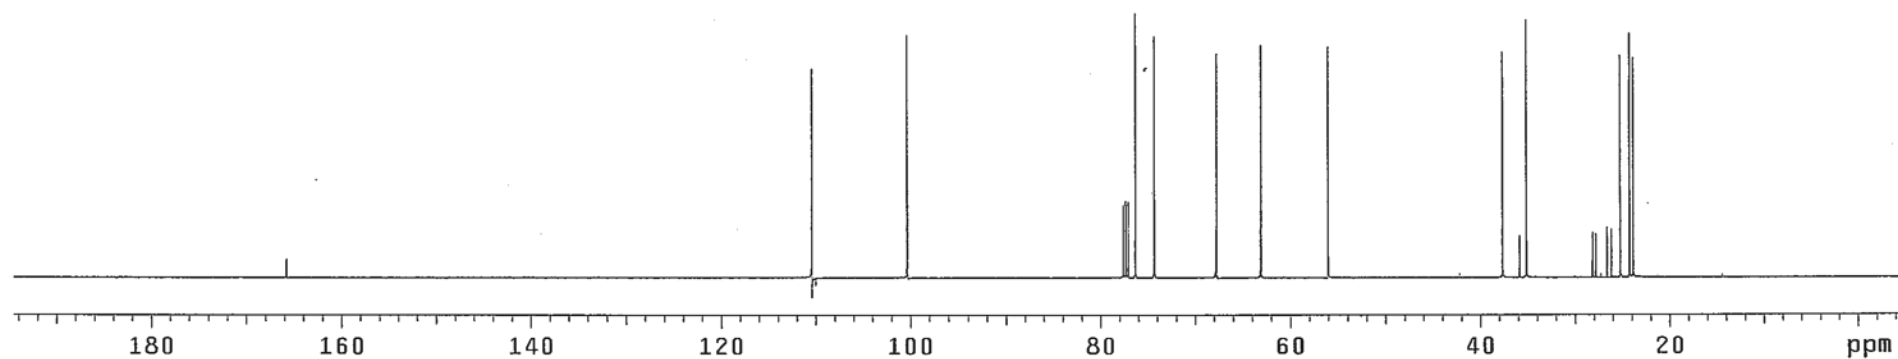

Archive directory: /export/home/jjzhang/vnmrsys/data  
Sample directory: jj-iii-106N255-B\_10Aug2011  
File: PROTON

Pulse Sequence: s2pul

Solvent: CDCl3  
Temp. 25.0 C / 298.1 K  
INOVA-400 "ui400"

Relax. delay 1.000 sec  
Pulse 45.0 degrees  
Acq. time 3.754 sec  
Width 6387.7 Hz  
8 repetitions  
OBSERVE H1, 399.7865188 MHz  
DATA PROCESSING  
FT size 65536  
Total time 0 min, 57 sec

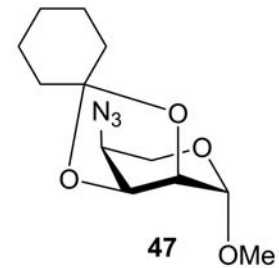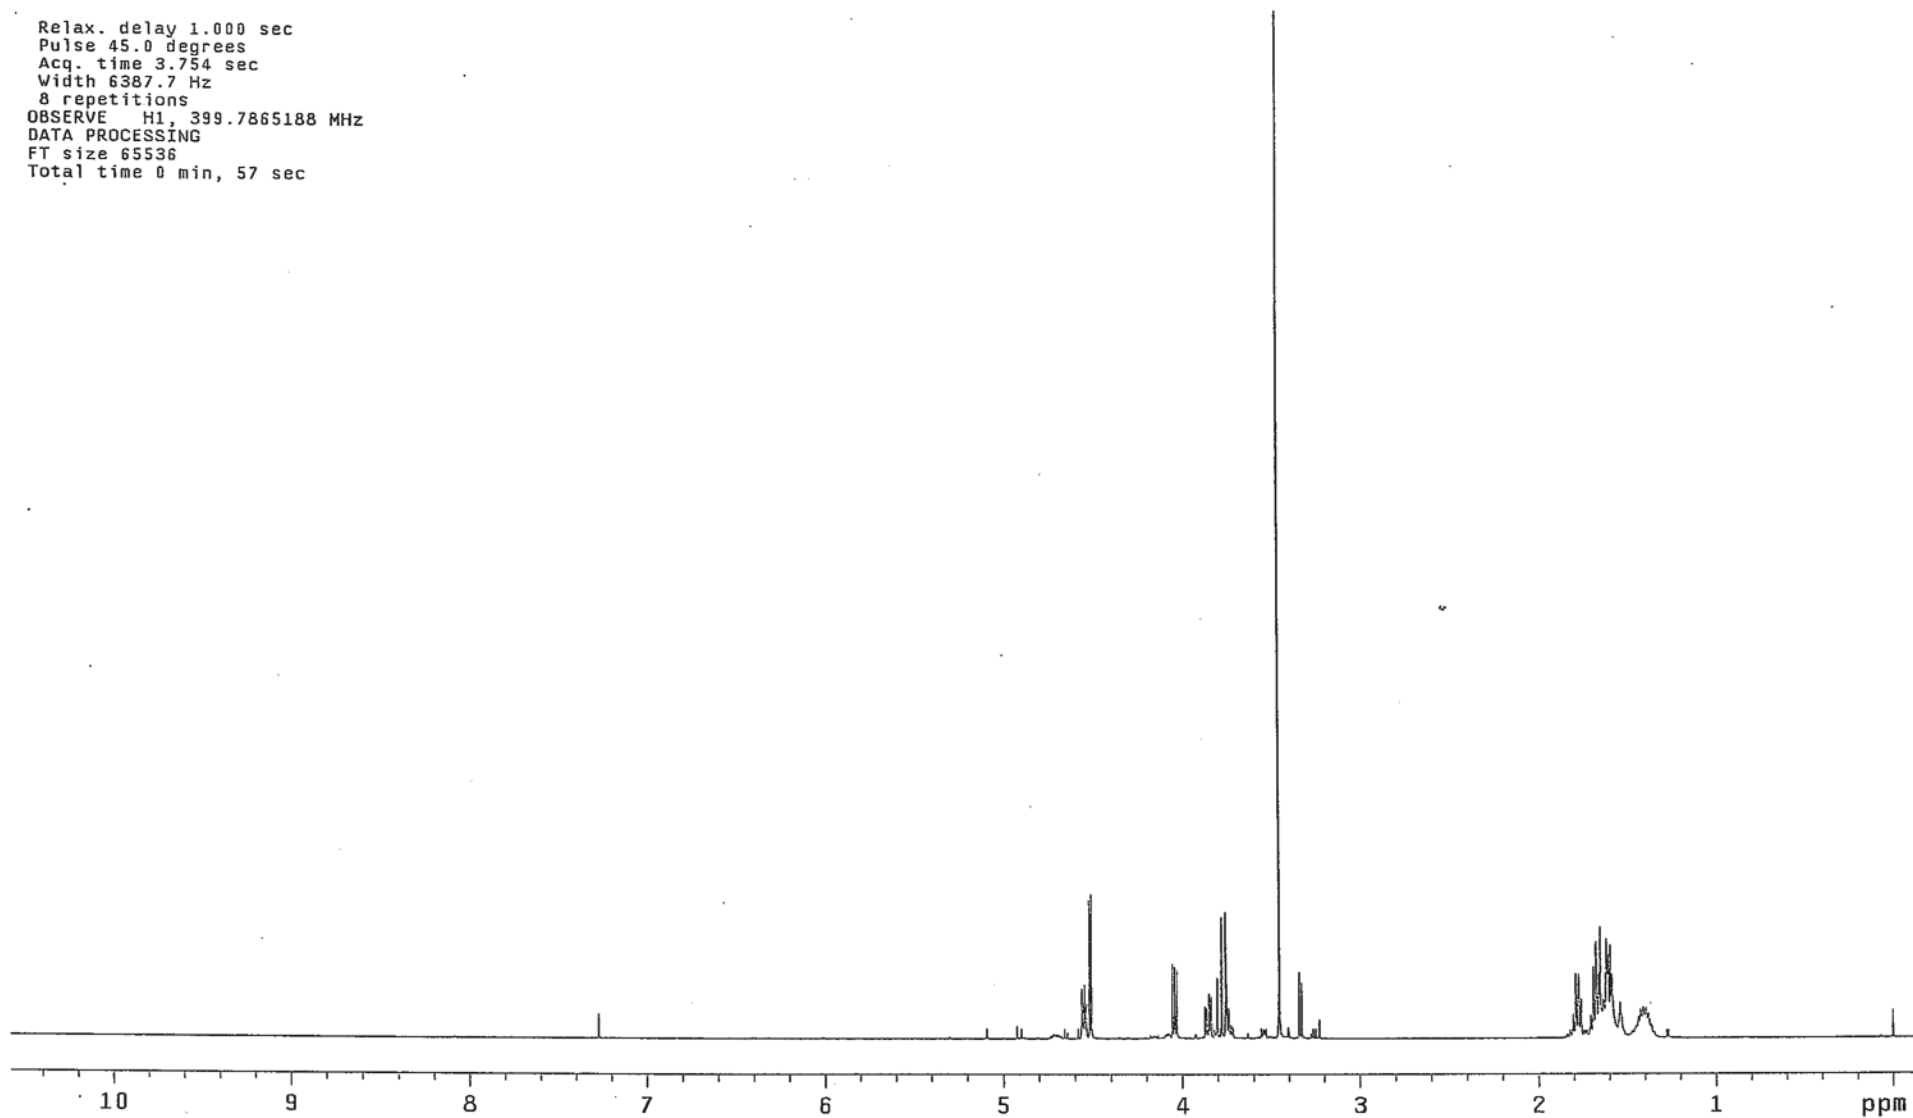





Archive directory: /export/home/jjzhang/vnmrsys/data  
Sample directory: jj-iii-71N236\_14Jul2011-10:00:31  
File: CARBON

Pulse Sequence: s2pu1  
Solvent: CDCl3  
Temp. 25.0 C / 298.1 K  
INOVA-400 "ui400"

Relax. delay 1.000 sec  
Pulse 45.0 degrees  
Acq. time 1.197 sec  
Width 25157.2 Hz  
512 repetitions  
OBSERVE C13, 100.5263777 MHz  
DECOUPLE H1, 399.7885243 MHz  
Power 41 dB  
continuously on  
WALTZ-16 modulated  
DATA PROCESSING  
Line broadening 0.8 Hz  
FT size 65536  
Total time 18 min, 49 sec

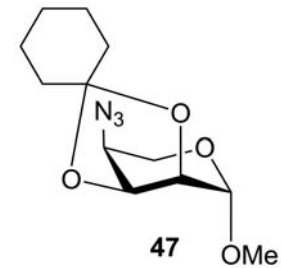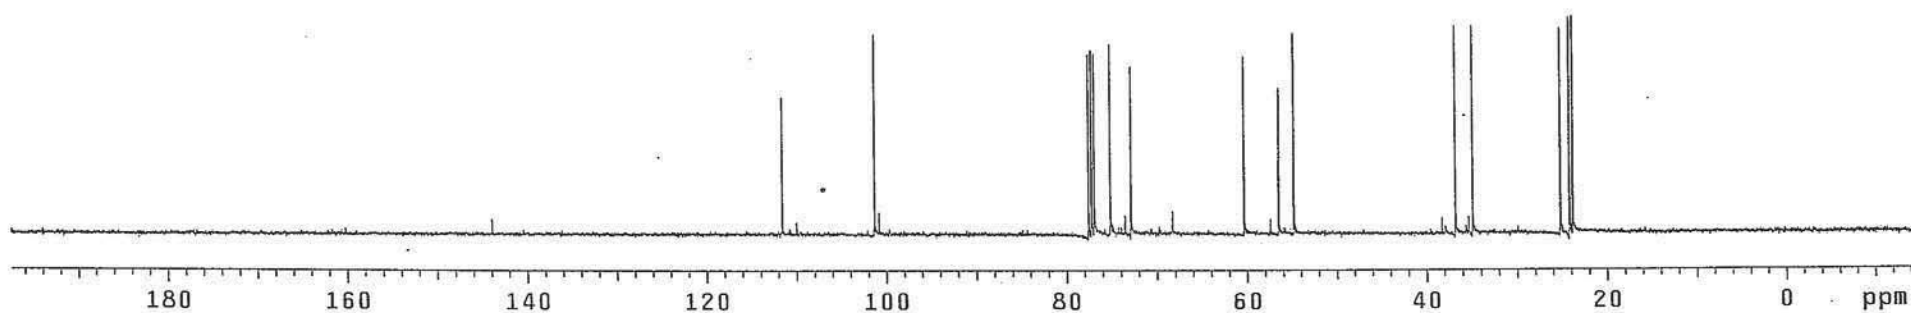

Supplement: NIHMS520324-supplement-1_si_001.pdf [file NIHMS520324-supplement-1_si_001.pdf]
